# Supplementary material for: High precision deep-learning model combined with high-throughput screening to discover fused [5,5] biheterocyclic energetic materials with excellent comprehensive properties
Source: Royal Society of Chemistry journal article supplement (doi:10.1039/d4ra03233k), 2024-01-01
Supplement: d4ra03233k1.pdf [file d4ra03233k1.pdf]

|                                                                                                                                                                                     |                                                                                                                                                                                   |                                                                                                                                                                                                  |
|-------------------------------------------------------------------------------------------------------------------------------------------------------------------------------------|-----------------------------------------------------------------------------------------------------------------------------------------------------------------------------------|--------------------------------------------------------------------------------------------------------------------------------------------------------------------------------------------------|
| 1                                                                                                                                                                                   | 2                                                                                                                                                                                 | 3                                                                                                                                                                                                |
| 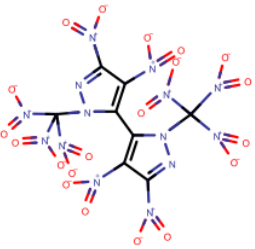 <p data-bbox="256 551 608 689">2.02 9320 40 125 J. Mater. Chem. A, 2018, 6, 14780–14786</p>       |  <p data-bbox="633 551 965 636">1.99 9481 41.9 210 Nat Commun, 2017, 8, 181</p>                  |  <p data-bbox="992 551 1331 734">1.987 8615 34.3 304 Propellants Explos. Pyrotech., 2016, 41(3): 470–483.</p> |
| 4                                                                                                                                                                                   | 5                                                                                                                                                                                 | 6                                                                                                                                                                                                |
|  <p data-bbox="256 1081 608 1220">1.98 9867 45 130.7 Scientific reports, 2019, 9(1): 4321</p>     |  <p data-bbox="633 1081 965 1220">1.98 9388 39.1 200 Chem. Eur. J. 2017, 23, 12087–12091</p>    |  <p data-bbox="992 1081 1331 1220">1.97 9033 34.2 121 New J. Chem., 2017, 41(17): 9070–9076.</p>             |
| 7                                                                                                                                                                                   | 8                                                                                                                                                                                 | 9                                                                                                                                                                                                |
|  <p data-bbox="256 1581 608 1720">1.97 9220 38.5 109.3 J. Mater. Chem. A, 2016, 4, 5495–5504</p> |  <p data-bbox="633 1581 965 1720">1.97 9180 38.7 143 J. Mater. Chem. A, 2017, 5, 4785–4790</p> |  <p data-bbox="992 1581 1331 1720">1.97 9430 41.6 135 J. Am. Chem. Soc. 2015, 137, 4778–4786</p>            |
| 10                                                                                                                                                                                  | 11                                                                                                                                                                                | 12                                                                                                                                                                                               |

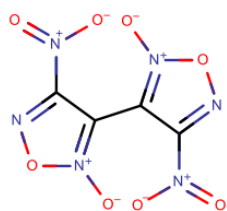

1.97 9525 41.2 140 European Journal of Inorganic Chemistry, 2014, 2014(34): 5808–5811

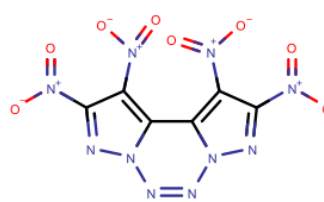

1.955 9631 44 233 J. Am. Chem. Soc. 2017, 139, 13684–13687

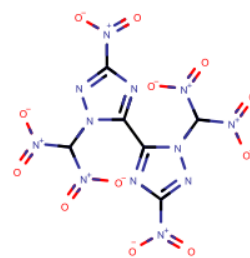

1.953 9394 39.7 166 Chem. Eur. J. 2017, 23, 12787–12794

13

14

15

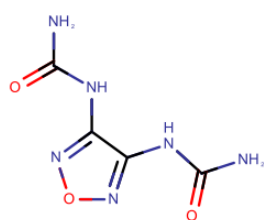

1.95 8283 24.5 239 Journal of Heterocyclic Chemistry, 2018, 55(4): 852–862.

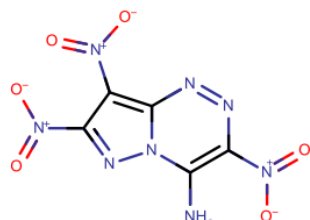

1.95 8998 36.04 246 J. Mater. Chem. A, 2015, 3, 17963–17965

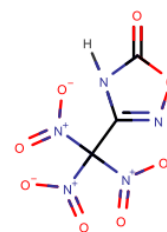

1.95 8798 33.1 112 Asian Journal of Organic Chemistry, 2018, 7(4): 739–750.

16

17

18

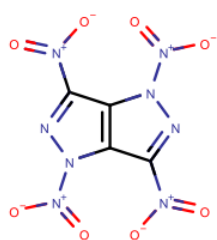

1.95 9460 40.9 145 Angew. Chem. Int. Ed., 2016, 55, 12895–12897

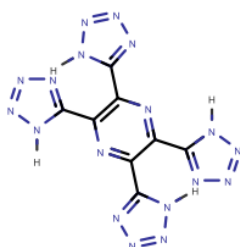

1.945 8655 28 260 ACS Appl. Energy Mater., 2018, 1, 589–593

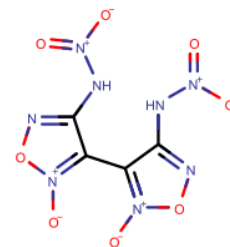

1.94 9472 41.7 91.3 J. Mater. Chem. A, 2016, 4(23): 8969–8973.

19

20

21

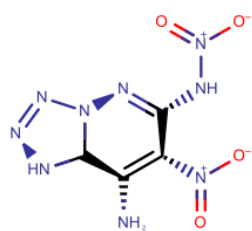

1. 94 9345 38 175.4 Energetic Materials Frontiers 1.1 (2020): 16-25.

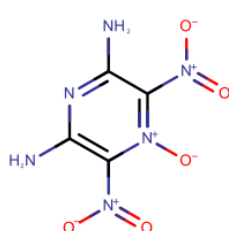

1. 94 9070 36.9 212 Chinese Journal of Energetic Materials, 2016, 24, 820-824

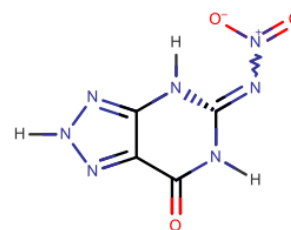

1. 94 8845 32.54 242 Chemical Engineering Journal Volume 404, 15 January 2021, 126514

22

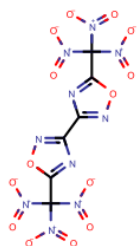

1. 94 8814 34.5 124 Chem. Eur. J. 2014, 20, 7622 - 7631

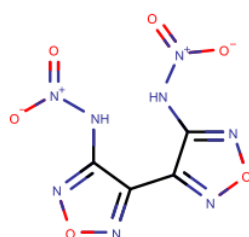

1. 94 9086 40.3 80 Chem. Eur. J. 2014, 20, 6401 - 6411

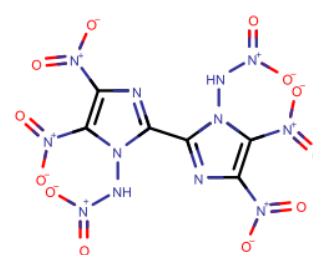

1. 94 9350 40.1 116 Angew. Chem. Int. Ed. 2015, 54, 14513 -14517

25

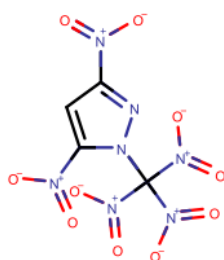

1. 937 8733 36.64 143 Chem. Asian J. 2015, 10, 1987-1996

26

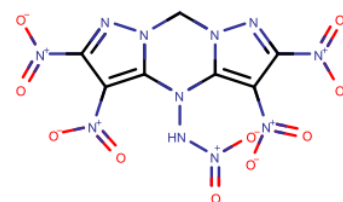

1. 936 9226 38.8 117 Angew. Chem. 2017, 129, 8960-8964

27

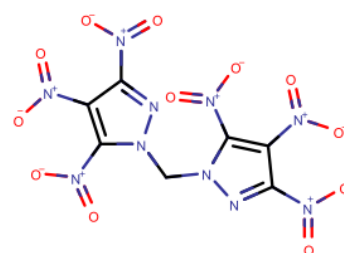

1. 934 9304 39.1 205 Angew. Chem. Int. Ed. 2016, 55, 16132 -16135

28

29

30

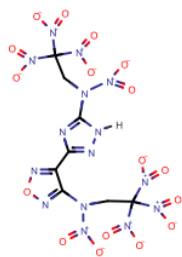

1. 932 9355 40.1 91.82  
Chemistry-A European  
Journal, 2018, 24(41  
) : 10488-10497.

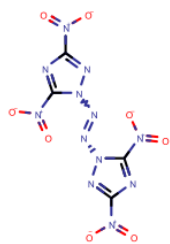

1. 93 9490 42.4 262.4  
RSC Adv., 2018, 8, 13  
755-13763

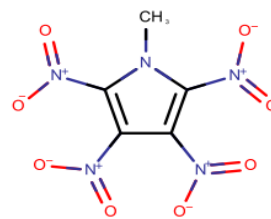

1. 93 8950 36.9 196  
New J. Chem., 2019

31

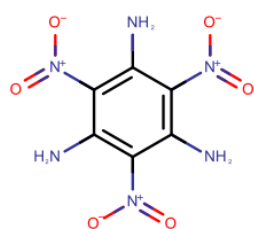

1. 93 8520 31.8 324 J.  
Mater. Chem. A, 2017,  
5, 1769-1777

32

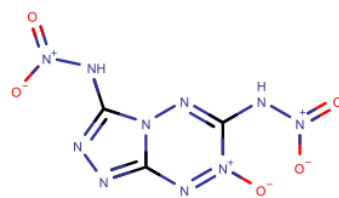

1. 93 9503 41 114 J. M  
ater. Chem. A, 2020,  
Advance Article

33

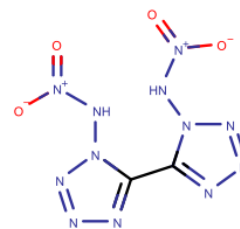

1. 93 10142 45.6 107 C  
hem. Eur. J. 2016, 22, 4  
966-4970

34

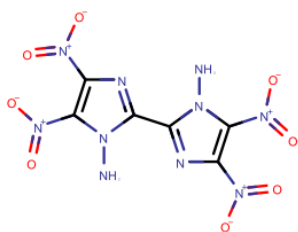

1. 93 9012 36.6 217 Ch  
em. Eur. J. 2016, 22, 21  
08-2113

35

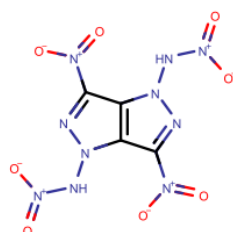

1. 93 9507 41.8 128 An  
gew. Chem. Int. Ed., 2016  
, 55, 12895-12897

36

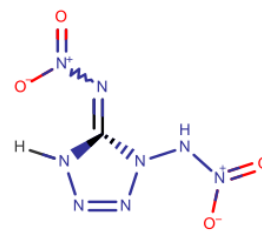

1. 93 9967 43.4 110 An  
gew. Chem. Int. Ed., 2015  
, 54, 10299 -10302

37

38

39

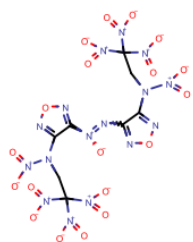

1.92 9458 41.2 144.6  
RSC Adv., 2015, 5, 2730  
5-27312

40

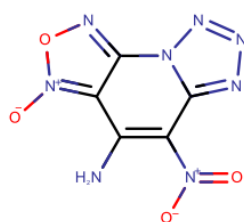

1.92 8838 36.01 134 N  
ew J. Chem., 2018, 42  
(14): 11259-11263.

41

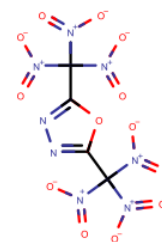

1.92 8229 29.2 102 J.  
Am. Chem. Soc. 2017,  
139, 8816-8819

42

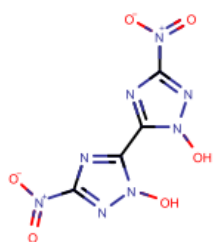

1.92 8729 36.2 191 J.  
Am. Chem. Soc. 2013,  
135, 9931-9938

43

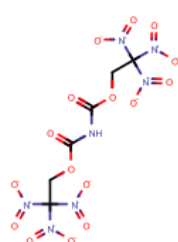

1.92 8675 23.7 183 Eu  
ropean Journal of Ino  
rganic Chemistry, 201  
6, 2016(19): 3086-309  
3.

44

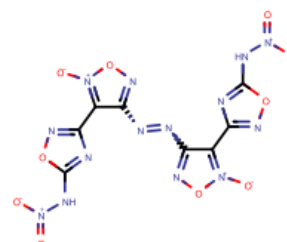

1.92 9505 41.3 126 Da  
lton Trans., 2019, 48,  
14705-14711

45

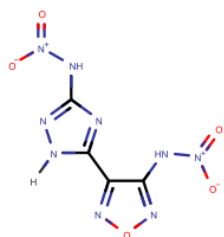

1.92 9258 39 128.7 An  
gew. Chem. Int. Ed. 2  
017, 56, 5877-5881

46

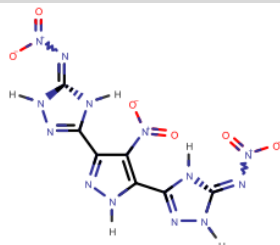

1.915 9008 35.9 134.4  
New J. Chem., 2019,  
43, 16300

47

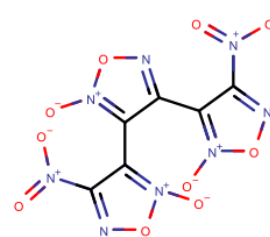

1.914 9503 40.8 146.5  
J. Mater. Chem. A, 2  
018, 6, 9391-9396

48

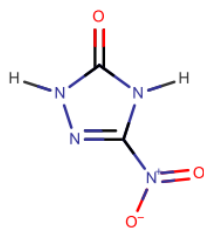

1.91 8477 31.3 236 C  
hem. Eur. J. 2017, 23  
, 16401-16407

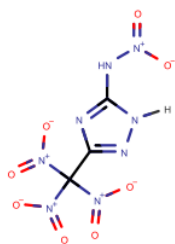

1.91 9250 36.9 125 Ne  
w J. Chem., 2017, 41(  
8): 3068-3072.

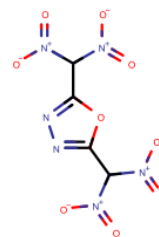

1.91 8967 36.9 86 J. A  
m. Chem. Soc., 2017, 139,  
8816-8819

49

50

51

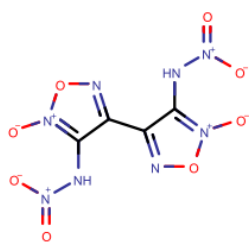

1.91 9381 40.8 74.5 J  
. Mater. Chem. A, 201  
6, 4(23): 8969-8973.

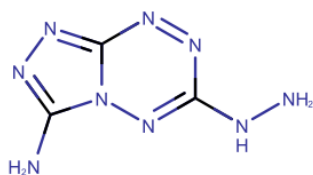

1.91 9200 34.8 305 J.  
Mater. Chem. A

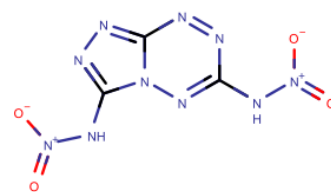

1.91 9301 38.3 138 J.  
Am. Chem. Soc., 2018  
, 140, 15001-15007

52

53

54

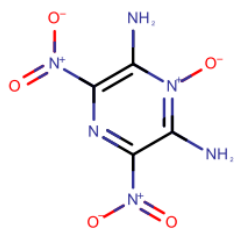

1.91 8560 33.4 342 Ch  
in. J. Energ. Mater.,  
2016, 24, 820-824

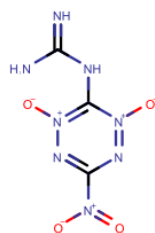

1.91 9157 37.5 134 Ch  
em. Eur. J. 2014, 20,  
16943 - 16952

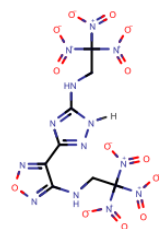

1.908 9087 38.1 168.0  
1 Chemistry-A Europea  
n Journal, 2018, 24(4  
1): 10488-10497.

55

56

57

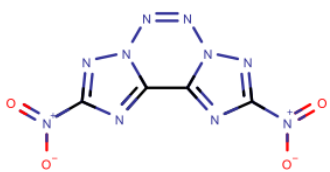

1. 907 9400 38 138 Angew. Chem. 2015, 127, 13165 -13167

58

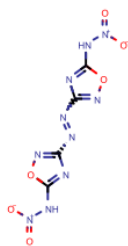

1. 902 9190 37.5 140 Angew. Chem. Int. Ed. 2016, 55, 3200-3203

59

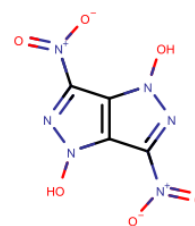

1. 9 8838 36.5 296 RSC Adv., 2016, 6, 84760-84768

60

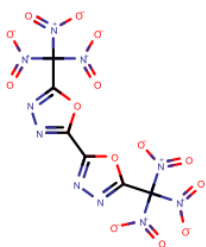

1. 9 8764 33.2 98.5 New J. Chem., 2017, 41, 1918-1924

61

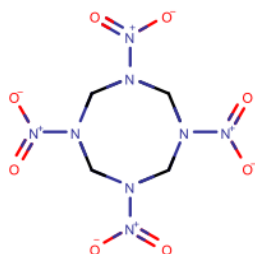

1. 9 9221 41.5 279 Nat Commun, 2017, 8, 181

62

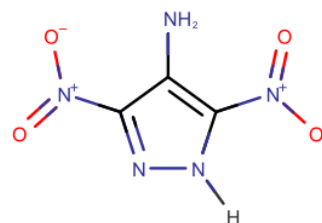

1. 9 8573 34.2 178 Molecules, 2014, 19(1): 896-910

63

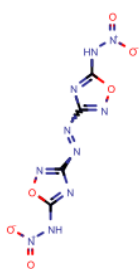

1. 9 9190 37.5 140 J. Mater. Chem. A, 2018, 6, 1915-1940

64

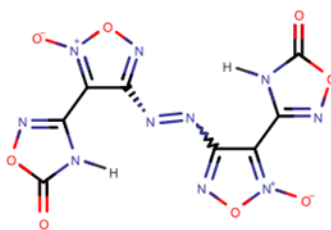

1. 90 8891 34.7 189 Dalton Trans., 2019, 48, 14705-14711

65

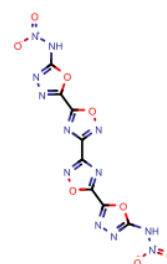

1. 9 8789 32.7 215 Chinese Journal of Energetic Materials, 2020, 28(7):632-637.

66

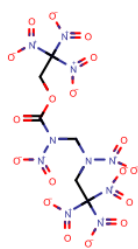

1. 9 8491 34 161 Chem.  
Eur. J. 2013, 19, 15  
627 – 15638

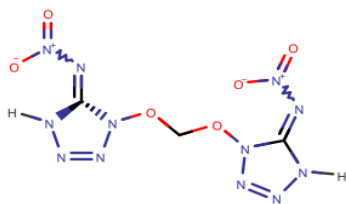

1. 9 9867 46.7 157 Ang  
ew. Chem. Int. Ed., 2  
010, 49(40): 7320–732  
3

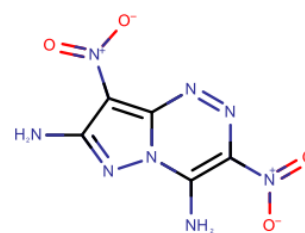

1. 9 8727 32.6 355 ACS  
Appl. Energy Mater.,  
2019, 2, 2263–2267

67

68

69

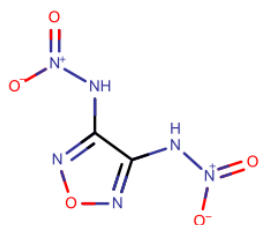

1. 899 9376 40.5 99 J.  
Am. Chem. Soc. 2015,  
137, 15984–15987

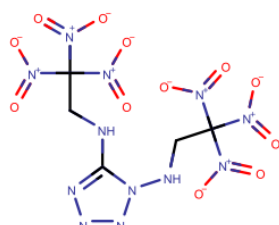

1. 897 9323 38.8 137.4  
Journal of Energetic  
Materials, 2014, 32(  
sup1): S33–S40.

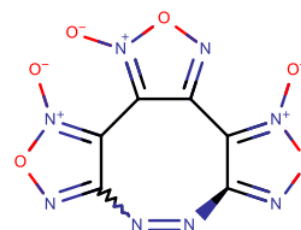

1. 895 9417 39.6 161.1  
J. Mater. Chem. A, 2  
018, 6, 9391–9396

70

71

72

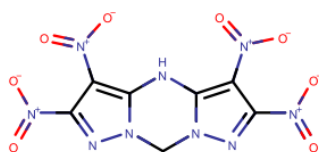

1. 894 8792 34.3 261 A  
ngew. Chem. 2017, 129  
, 8960–8964

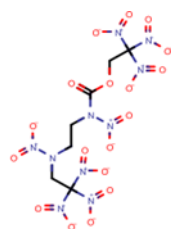

1. 89 9083 36.5 157 Z.  
Anorg. Allg. Chem. 2  
016, 887–895

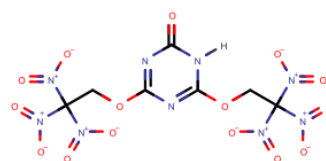

1. 89 8330 30 167.6 RS  
C Adv., 2016, 6, 34921  
–34934

73

74

75



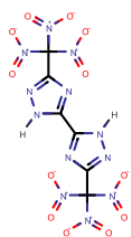

1. 89 9073 36.2 148 New J. Chem., 2018, 42, 2376-2380

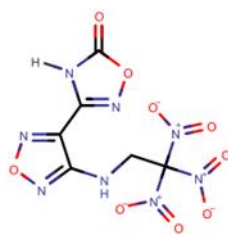

1. 89 8892 35.81 161.83 New J. Chem., 2018, 42, 19671-19677

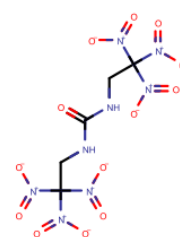

1. 89 9307 39.6 142 New J. Chem., 2017, 41, 4797-4801

76

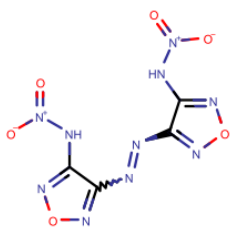

1. 89 9517 41.1 100 J. Mater. Chem. A, 2018, 6, 1915-1940

77

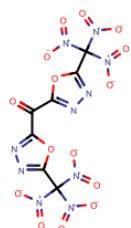

1. 89 8665 32.7 108 Chem. Eur. J. 2017, 23, 17682-17686

78

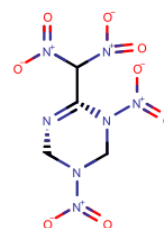

1. 887 9169 39 102 Chem. Commun., 2018, 54, 9333-9336

79

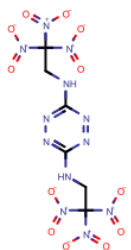

1. 886 9261 38.9 189 Journal of Energetic Materials, 2014, 32(sup1): S33-S40.

80

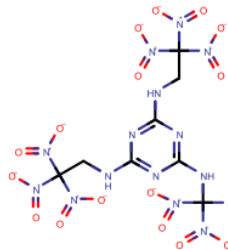

1. 886 9000 37.64 186 Journal of Energetic Materials, 2014, 32(sup1): S33-S40.

81

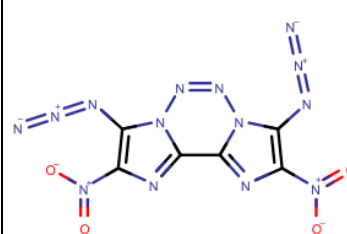

1. 886 9256 36.7 111 Eur. J. Org. Chem. 2018, 2273-2276

82

83

84

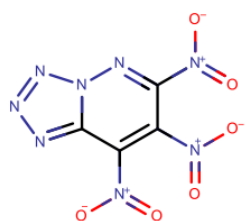

1. 886 9021 34.8 202 C  
hem. Commun., 2020, 5  
6, 1493

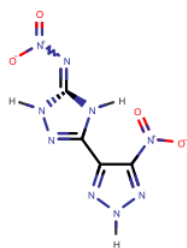

1. 883 9067 36.2 168.4  
5 J. Mater. Chem. A,  
2018, 6(5): 2239–2248

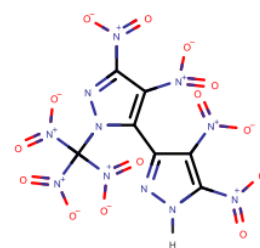

1. 882 8987 36 150 J.  
Mater. Chem. A, 2018,  
6, 5136–5142

85

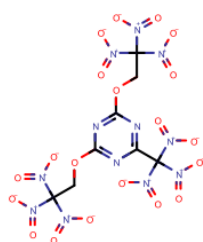

1. 88 8630 32.8 169.5  
RSC Adv., 2016, 6, 349  
21–34934

86

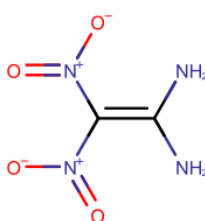

1. 88 9000 35.9 220 NA  
TURE COMMUNICATIONS 2  
018 9 2444

87

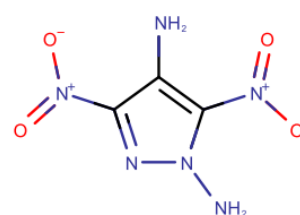

1. 88 8732 35 241 J. M  
ater. Chem. A, 2013,  
1, 2863–2868

88

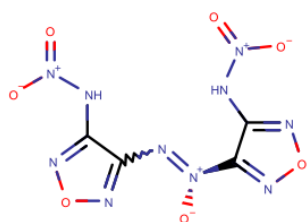

1. 88 9131 40 70 Chem.  
Eur. J. 2014, 20, 64  
01 – 6411

89

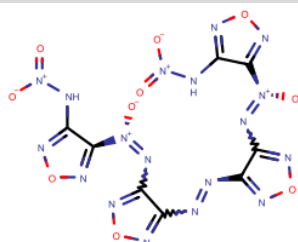

1. 88 9541 40.5 120 An  
gew. Chem. Int. Ed., 2016  
, 55, 1–5

90

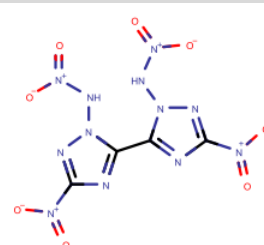

1. 88 9243 38.2 121 An  
gew. Chem. Int. Ed. 2  
015, 54, 14513 –14517

91

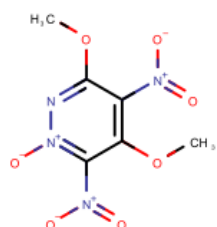

1. 59 7227 20.8 151 Eu  
r. J. Org. Chem. 2018  
, 1004–1010

92

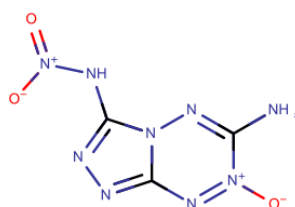

1. 88 9047 35.1 182 AC  
S Appl. Energy Mater.  
2020, 3, 5510–5516

93

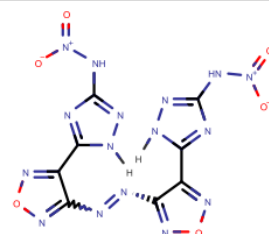

1. 873 8973 34.9 174.3  
Angew. Chem. Int. Ed  
. 2017, 56, 5877–5881

|                                                                                                                                                         |                                                                                                                                                                                 |                                                                                                                                                           |
|---------------------------------------------------------------------------------------------------------------------------------------------------------|---------------------------------------------------------------------------------------------------------------------------------------------------------------------------------|-----------------------------------------------------------------------------------------------------------------------------------------------------------|
| 94                                                                                                                                                      | 95                                                                                                                                                                              | 96                                                                                                                                                        |
|  <p>1. 871 8899 35. 83 135<br/>New J. Chem., 2019, 43, 10429–10433</p> |  <p>1. 87 8041 25. 1 125 Ne<br/>w J. Chem., 2019, 43, 16300–16304</p>                          |  <p>1. 87 8041 25. 1 125 Ne<br/>w J. Chem., 2019, 43, 16300</p>        |
| 97                                                                                                                                                      | 98                                                                                                                                                                              | 99                                                                                                                                                        |
|  <p>1. 87 8884 33. 1 248 Ne<br/>w J. Chem., 2018, 42, 14087–14090</p>  |  <p>1. 87 8685 32. 2 140 Jo<br/>urnal of Heterocyclic<br/>Chemistry, 2018, 55(4): 852–862.</p> |  <p>1. 87 9486 40. 8 159 J.<br/>Mater. Chem. A, 2015, 3, 8156–8164</p> |
| 100                                                                                                                                                     | 101                                                                                                                                                                             | 102                                                                                                                                                       |
|  <p>1. 87 8876 36. 9 130 J.<br/>Mater. Chem. A, 2013, 1, 585–593</p> |  <p>1. 87 8890 35. 8 / Eur.<br/>J. Org. Chem. 10.1002/ejoc.201801525</p>                     |  <p>1. 87 8413 32 251 Eur.<br/>J. Inorg. Chem. 2012, 3474–3484</p>   |
| 103                                                                                                                                                     | 104                                                                                                                                                                             | 105                                                                                                                                                       |

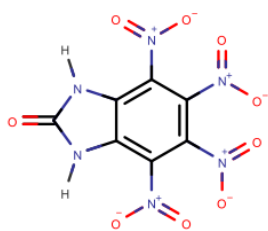

1.87 8368 30.19 299 Dalton Transactions, 2016, 45(35): 13827-13833.

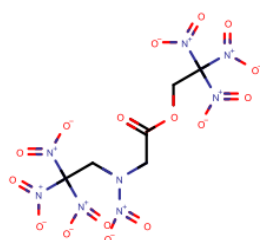

1.87 8518 34.5 183 Chem. Eur. J. 2013, 19, 15627 - 15638

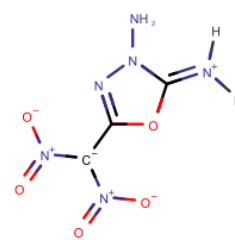

1.87 8982 35.9 143 Chem. Commun., 2020, 56, 209

106

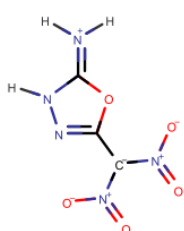

1.87 8828 34.6 138 Chem. Commun., 2020, 56, 209

107

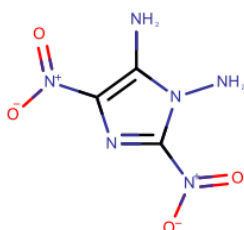

1.87 8806 34 190.2 Chem. Commun., 2016, 52, 8123-8126

108

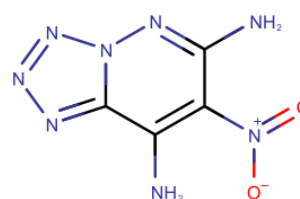

1.869 8899 30.3 287 Chem. Commun., 2020, 56, 1493

109

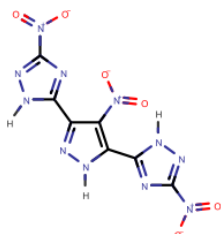

1.865 8747 33 238.2 New J. Chem., 2019, 43, 16300

110

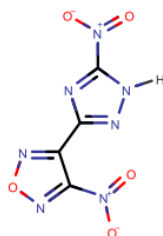

1.863 9152 37.1 191.15 Chemistry-A European Journal, 2018, 24(41): 10488-10497.

111

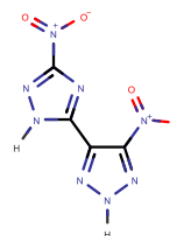

1.861 8961 35.2 210.83 J. Mater. Chem. A, 2018, 6(5): 2239-2248

112

113

114

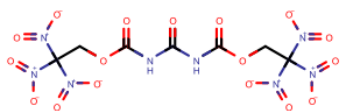

1.86 8363 29.8 169 Z.  
Anorg. Allg. Chem. 2  
014, 84–92

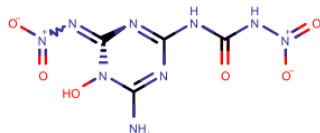

1.86 8762 32.6 157 Ne  
w J. Chem., 2019, 43,  
10675–10679

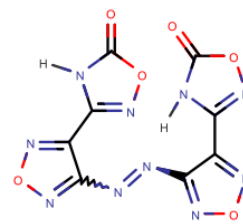

1.86 8471 30.2 315.75  
New J. Chem., 2018,  
42, 19671–19677

115

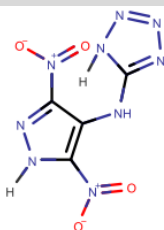

1.86 9289 38.6 279 J.  
Mater. Chem. A, 2017,  
5, 1769–1777

116

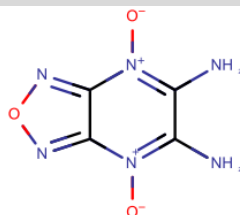

1.86 8836 36 131.8 Ch  
inese Journal of Ener  
getic Materials, 2020,  
28(7):625–631.

117

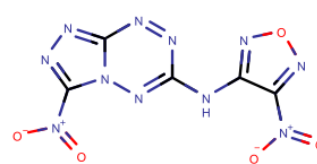

1.86 9182 36.7 184.2  
Chemistry–An Asian Jo  
urnal, 2018, 13(23):  
3718–3722.

118

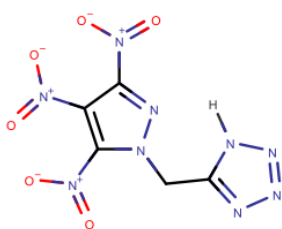

1.86 8845 34.5 155 Ch  
em. Eur. J. 2017, 23,  
7876 – 7881

119

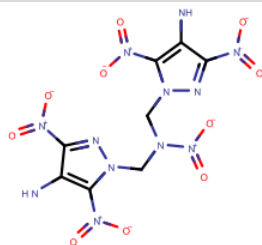

1.86 8639 34.7 232 Ch  
em. Eur. J. 2013, 19,  
8929 – 8936

120

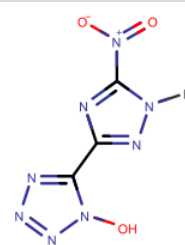

1.86 8655 33.7 152 Ch  
em. Eur. J. 2013, 19,  
12042 – 12051

121

122

123

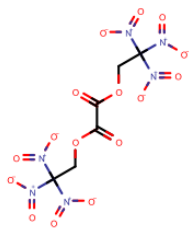

1. 84 8275 28.6 186 Eu  
ropean Journal of Ino  
rganic Chemistry, 201  
6, 2016(19): 3086-309  
3.

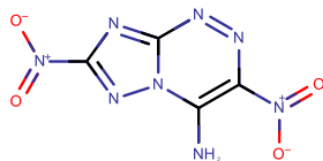

1. 86 8700 32 232 Ange  
w. Chem. Int.Ed. 2016  
, 55, 15315 -15318

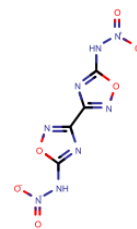

1. 856 8388 31.8 137 N  
ew J. Chem., 2018, 42  
(14): 11390-11395.

124

125

126

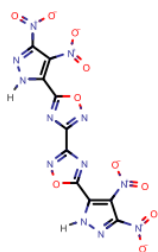

1. 856 8685 33.4 272 C  
hemPlusChem, 2019, 84  
(10), 1567 - 1577

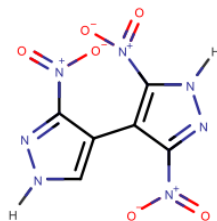

1. 855 8256 28.6 314 N  
ew J. Chem., 2019, 43  
(3): 1305-1312

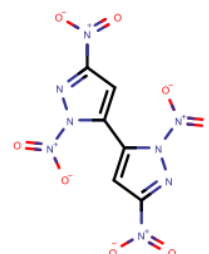

1. 855 8926 35.4 152 C  
hem. Eur. J. 2018, 24  
, 17220 - 17224

127

128

129

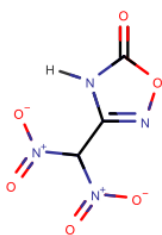

1. 854 8454 31.3 76 Ch  
em. Eur. J. 2017, 23,  
16401-16407

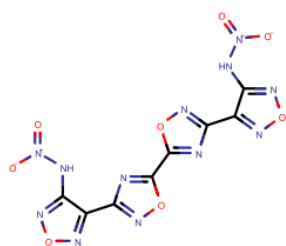

1. 853 8793 33.3 84 Cr  
ystEngComm, 2018, 20,  
4321-4328

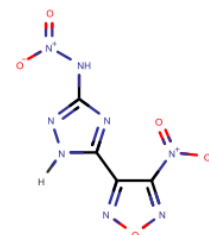

1. 851 9025 36 163.2 A  
ngew. Chem. Int. Ed.  
2017, 56, 5877-5881

130

131

132

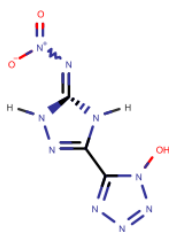

1.85 8776 34.2 116 Z.  
Anorg. Allg. Chem. 2  
013, 2171–2180

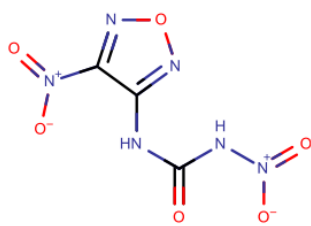

1.85 8930 34.8 122 Jo  
urnal of Heterocyclic  
Chemistry, 2018, 55(  
4): 852–862.

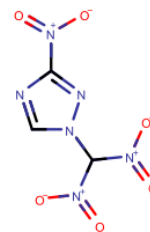

1.85 9050 37 130.5 J.  
Mater. Chem. A, 2016,  
4, 5495–5504

133

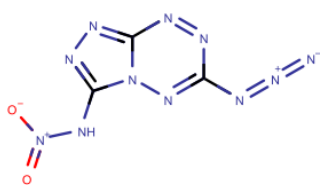

1.85 9236 36.3 150 J.  
Mater. Chem. A, 2019  
, 7(13): 7875–7884

134

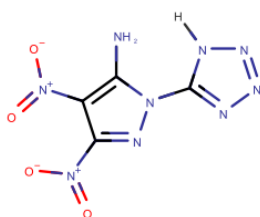

1.85 9261 38.3 222 J.  
Mater. Chem. A, 2017  
, 5, 5044–5054

135

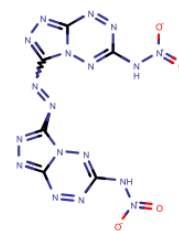

1.85 9500 39.8 170 J.  
Am. Chem. Soc., 2018  
, 140, 15001–15007

136

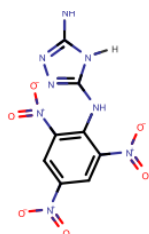

1.85 8178 27.8 261 Eu  
r. J. Inorg. Chem. 20  
16, 956–962

137

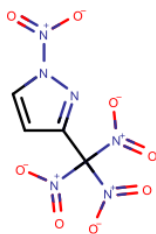

1.85 8933 35.9 113 Da  
lton Trans., 2019, 48  
, 1524

138

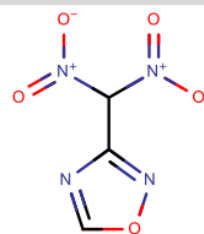

1.85 8527 32.3 165 Da  
lton Trans., 2017, 46,  
14210–14218

139

140

141

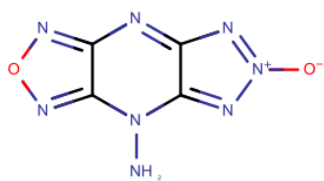

1.85 8532 32.4 247.1  
Chinese Journal of Energetic Materials, 2020, 28(7):664-669.

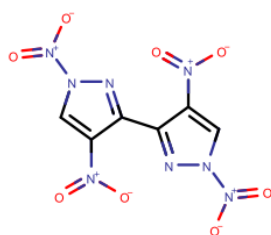

1.85 8869 34.5 206 Ch  
em. Eur. J. 2018, 24,  
17220 - 17224

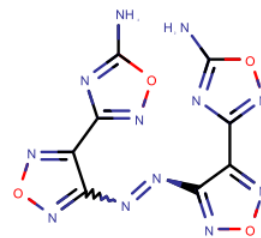

1.85 8445 28.3 267 Ch  
em. Eur. J. 2016, 22,  
12527-12532

142

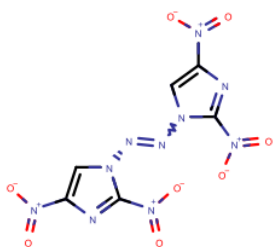

1.85 8979 35.6 258 Ch  
em. Eur. J. 2014, 20,  
6707- 6712

143

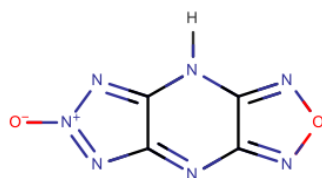

1.85 8532 32.4 281 Ch  
em. Eur. J. 2014, 20,  
542 - 548

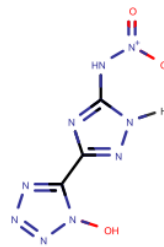

1.85 8776 34.2 116 Ch  
em. Eur. J. 2013, 19,  
12042 - 12051

145

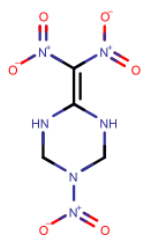

1.85 8938 35.4 164 Ch  
em. Commun., 2018, 54,  
9333-9336

146

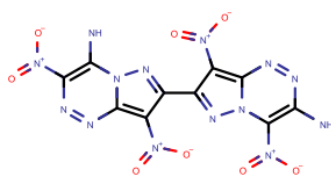

1.85 8572 31.4 315 Ch  
em. Commun., 2018, 54,  
10566-10569

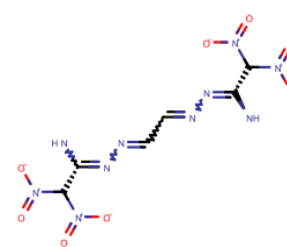

1.85 8680 33.14 225.6  
Chem. Commun., 2016,  
52, 7668-7671

148

149

150



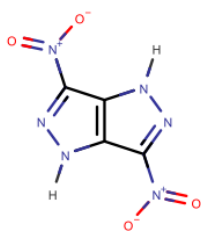

1. 85 8250 27.4 336 An  
gew. Chem. Int. Ed. 2016,  
55, 12895–12897

151

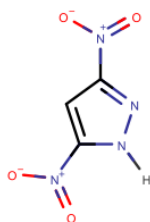

1. 844 8388 32.7 295 M  
olecules, 2014, 19(1)  
: 896–910

152

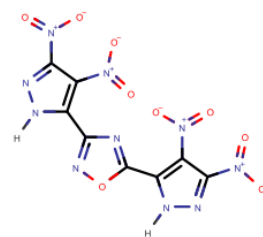

1. 843 8741 34 274 Che  
mPlusChem, 2019, 84(1  
0), 1567 – 1577

153

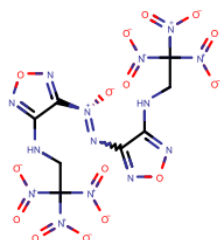

1. 84 9041 36.7 190.2  
RSC Adv., 2015, 5, 2730  
5–27312

154

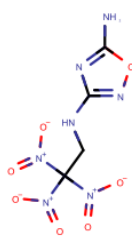

1. 84 8770 34.6 155 Ne  
w J. Chem., 2017, 41,  
4797–4801

155

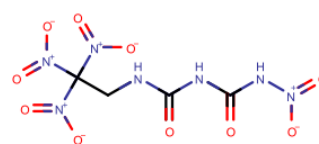

1. 84 8752 34.5 114 Ne  
w J. Chem., 2017, 41,  
4797–4801

156

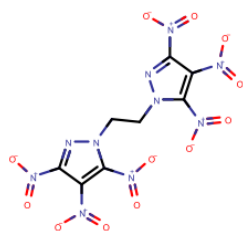

1. 84 8759 34.1 250 J.  
Mater. Chem. A, 2016,  
4, 9220–9228

157

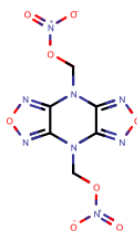

1. 84 8669 33.4 196 J.  
Mater. Chem. A, 2016,  
4, 7430–7436

158

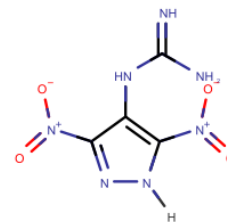

1. 84 8461 31 308 J. M  
ater. Chem. A, 2013,  
1, 2863–2868

159

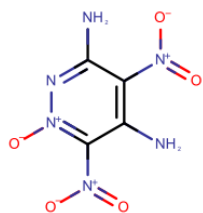

1.84 8486 30.2 215 Eur. J. Org. Chem. 2018, 1004–1010

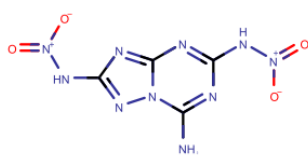

1.84 8787 34.2 189 Dalton Transactions, 2018, 47, 14483–14490.

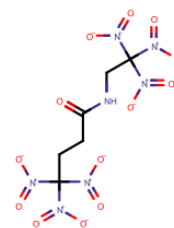

1.84 8628 33.5 155 Dalton Transactions, 2016, 45(47): 18909–18920.

160

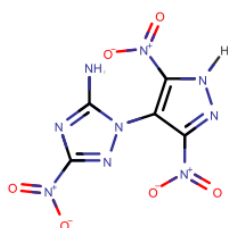

1.84 9167 37.8 270 Dalton Trans., 2016, 45, 17956–17965

161

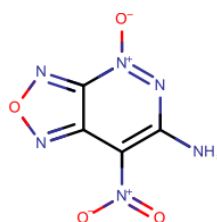

1.84 8695 32.9 175 Chem. Eur. J. 2017, 23, 15022–15025

162

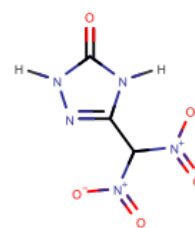

1.906 8597 33.1 127 J. Am. Chem. Soc. 2015, 137, 1697–1704

163

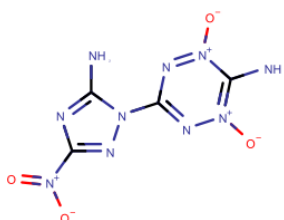

1.84 8707 32 168 Chem. Eur. J. 2014, 20, 16943 – 16952

164

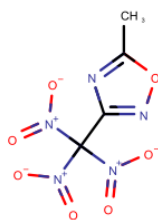

1.84 8779 34.6 148 Asian Journal of Organic Chemistry, 2018, 7(4): 739–750.

165

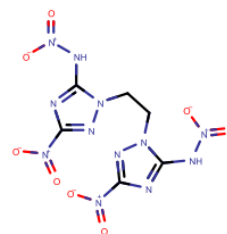

1.84 8816 34.3 107 Angew. Chem. Int. Ed. 2014, 53, 12889 –12892

166

167

168

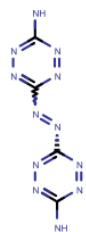

1.84 8800 28.5 252 AC  
S Appl. Energy Mater.  
, 2018, 1, 589–593

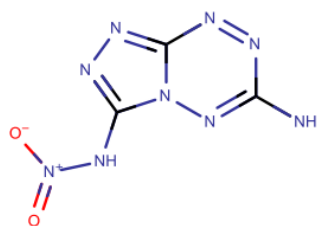

1.84 8938 32.9 241 AC  
S Appl. Energy Mater.  
2020, 3, 5510–5516

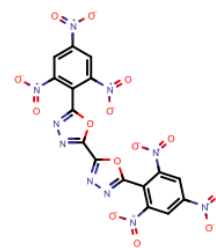

1.837 8030 27.3 335 C  
hemPlusChem 2016, 81,  
357 –360

169

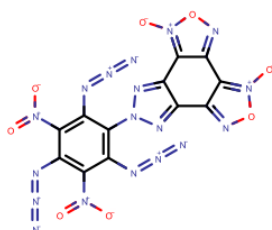

1.837 8094 26.5 153 C  
hem. Commun., 2018, 54  
, 10296–10299

170

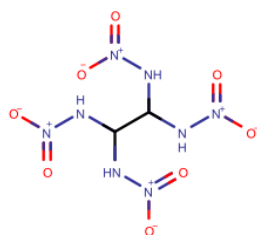

1.836 9750 41 158.7 C  
hemistrySelect 2019,  
4, 3582 –3584

171

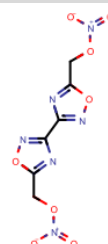

1.832 8180 29.4 183.4  
Org. Process Res. De  
v. 2018, 22, 736–740

172

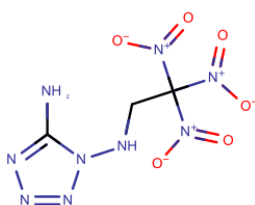

1.831 9194 37 131.9 J  
ournal of Energetic M  
aterials, 2014, 32(su  
p1): S33–S40.

173

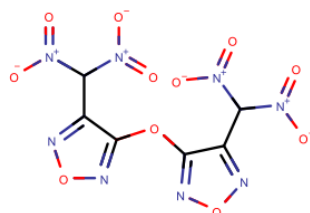

1.83 8715.3 34.8 196  
RSC Adv., 2015, 5, 2142  
2–21429

174

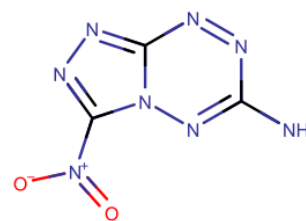

1.83 8953 33.9 213 Ne  
w J. Chem., 2019, 43,  
1663–1666

175

176

177

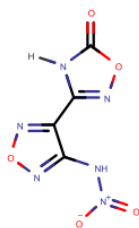

1.83 8644 32.5 127.25  
New J. Chem., 2018,  
42, 19671–19677

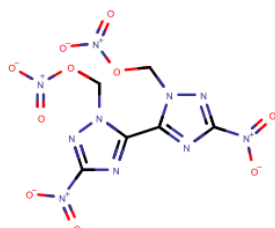

1.83 8639 32.7 176 J.  
Mater. Chem. A, 2016,  
4, 7430–7436

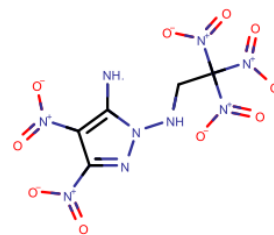

1.83 8803 35 106 J. M  
ater. Chem. A, 2014, 2  
, 3200–3208

178

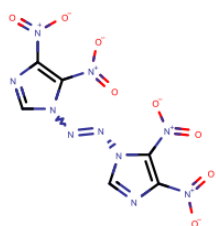

1.83 8932 35.1 232 J.  
Mater. Chem. A, 2018  
, 6, 1915–1940

179

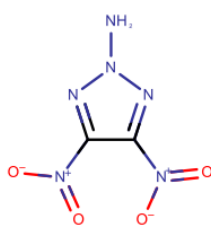

1.83 8843 36.2 190 J.  
Mater. Chem. A, 2013  
, 1, 585–593

180

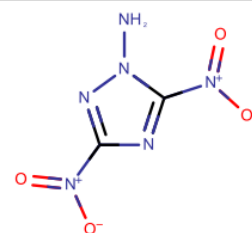

1.83 8725 34.9 165 J.  
Mater. Chem. A, 2013  
, 1, 585–593

181

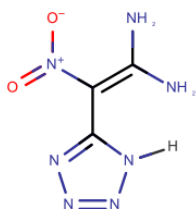

1.83 8499 26.7 275 J.  
Am. Chem. Soc. 2020,  
142, 7153–7160

182

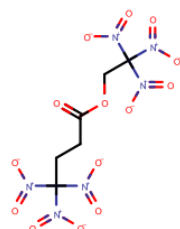

1.83 8616 32.4 155 Da  
lton Transactions, 20  
16, 45(47): 18909–189  
20.

183

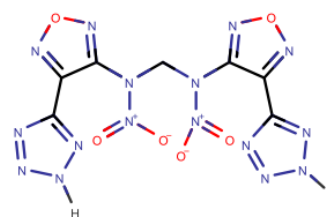

1.83 9043 35.6 154 Cr  
yst. Growth Des. 2017  
, 17, 6105–6110

184

185

186

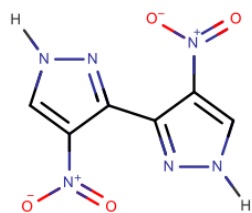

1. 83 8120 26.9 365 Ch  
em. Eur. J. 2018, 24,  
17220 – 17224

187

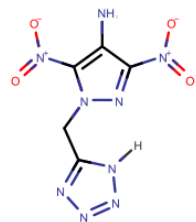

1. 83 8548 30 208 Chem  
. Eur. J. 2017, 23, 7  
876 – 7881

188

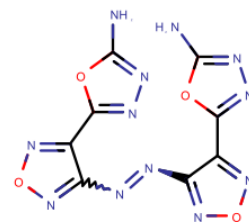

1. 83 8323 27.3 233 Ch  
em. Eur. J. 2016, 22,  
12527–12532

189

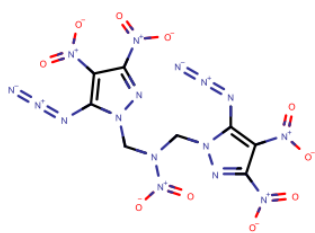

1. 83 8724 35.2 169 Ch  
em. Eur. J. 2013, 19,  
8929 – 8936

190

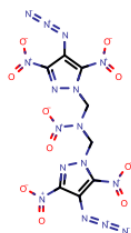

1. 83 8717 35.1 166 Ch  
em. Eur. J. 2013, 19,  
8929 – 8936

191

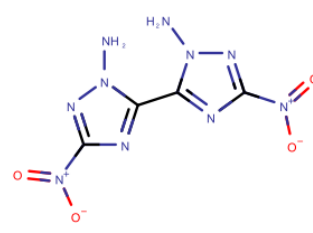

1. 83 8677 31.8 271 An  
gew. Chem. Int. Ed. 2  
015, 54, 14513 –14517

192

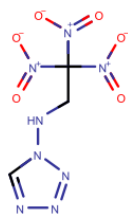

1. 825 8938 37.3 116 J  
ournal of Energetic M  
aterials, 2014, 32(su  
p1): S33–S40.

193

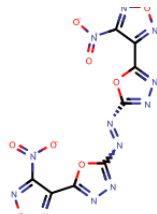

1. 825 8800 35.1 278 C  
ryst. Growth Des., 20  
19, 19, 839–844

194

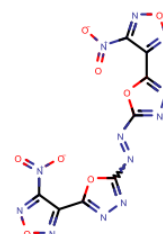

1. 825 8800 35.1 278 C  
ryst. Growth Des. 201  
9, 19, 839–844

195

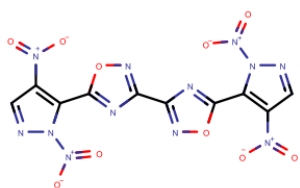

1.825 8867 34.5 172 C  
hemPlusChem, 2019, 84  
(10), 1567 – 1577

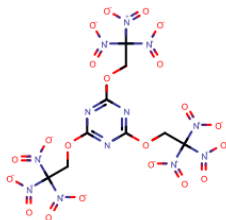

1.82 8460 32.2 168.8  
RSC Adv., 2016, 6, 349  
21-34934

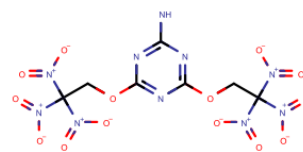

1.82 8290 31.1 148.9  
RSC Adv., 2016, 6, 349  
21-34934

196

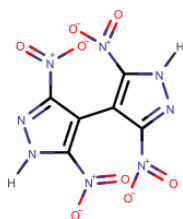

1.82 8520 31.1 298 Ne  
w J. Chem., 2019, 43(3):  
1305-1312

197

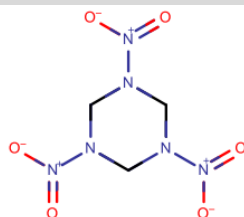

1.82 8700 33.7 210 Ne  
w J. Chem., 2017, 41,  
168-179

198

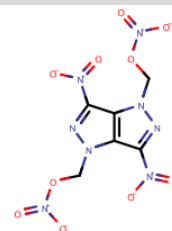

1.82 8674 33.1 206 J.  
Mater. Chem. A, 2016,  
4, 7430-7436

199

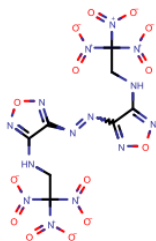

1.82 8900 35.4 230 J.  
Mater. Chem. A, 2015,  
3, 8156-8164

200

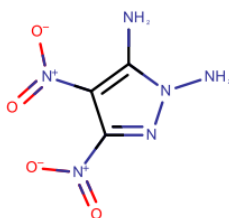

1.82 8689 32.8 254 J.  
Mater. Chem. A, 2014,  
2, 3200-3208

201

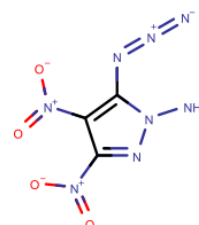

1.82 9053 35.8 121 J.  
Mater. Chem. A, 2014,  
2, 3200-3208

202

203

204

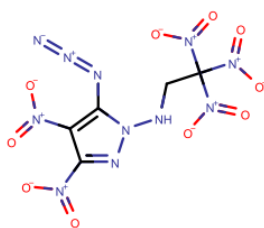

1.82 8968 35.6 117 J. Mater. Chem. A, 2014, 2, 3200–3208

205

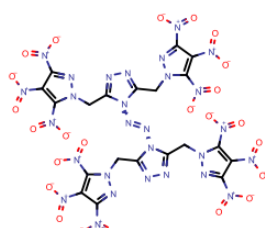

1.82 8640 32.3 151 J. Mater. Chem. A, 2018, 6, 1915–1940

206

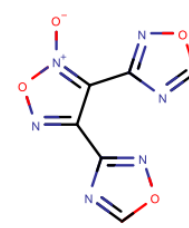

1.82 8043 26.8 214 Dalton Trans., 2017, 46, 14210–14218

207

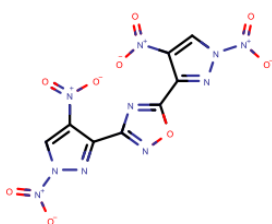

1.82 8904 35.1 156 ChemPlusChem, 2019, 84(10), 1567 – 1577

208

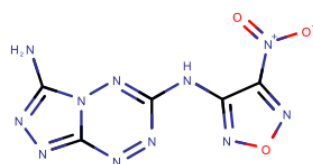

1.82 8755 32.1 249.5 Chemistry-An Asian Journal, 2018, 13(23): 3718–3722.

209

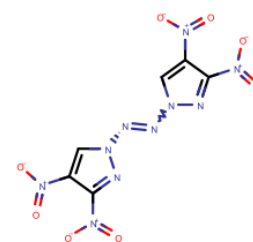

1.82 8964 35.1 223 Chem. Eur. J. 2014, 20, 6707– 6712

210

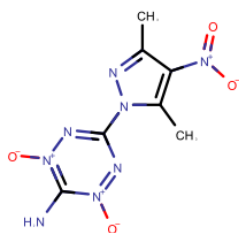

1.82 8413 27.5 211 Chem. Eur. J. 2014, 20, 16943 – 16952

211

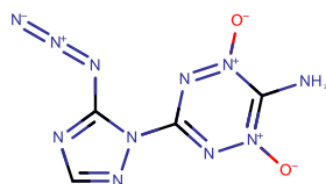

1.82 8731 30.9 161 Chem. Eur. J. 2014, 20, 16943 – 16952

212

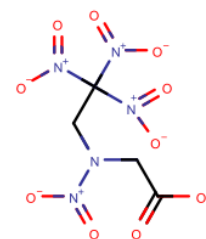

1.82 8351 32.3 167 Chem. Eur. J. 2013, 19, 15627 – 15638

213

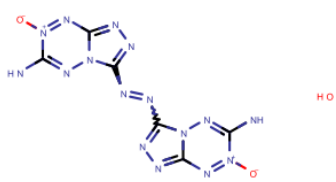

1. 82 8542 28. 8 210 Ch  
em. Commun., 2019, 55,  
8979–8982

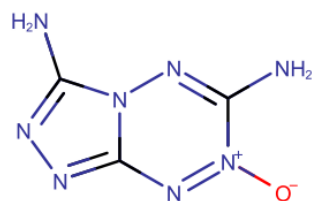

1. 82 9008 30. 1 191 Ch  
em. Commun., 2019, 55,  
8979–8982

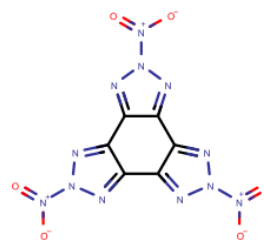

1. 82 8376 31. 2 38 Ang  
ew. Chem. Int. Ed. 20  
12, 51, 9881 –9885

214

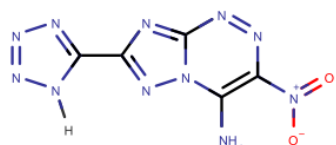

1. 819 8312 27. 04 305  
Propellants Explos. P  
yrotech. 2017, 42, 23  
8–242

215

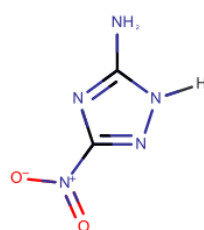

1. 819 8582 31. 5 246 M  
olecules, 2014, 19(1)  
: 896–910

216

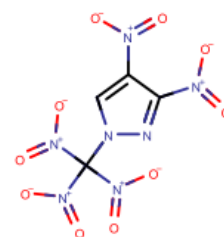

1. 906 8668 35. 51 141  
Chem. Asian J. 2015,  
10, 1987–1996

217

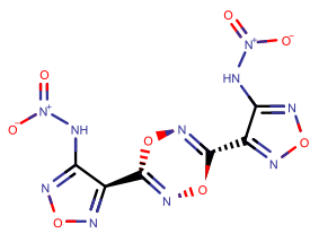

1. 816 8490 32. 2 95 Da  
lton Transactions, 20  
16, 45(39): 15382–153  
89.

218

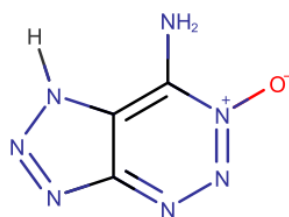

1. 815 8792 30. 3 194 A  
CS Appl. Energy Mater  
. 2019, 2, 8871–8877

219

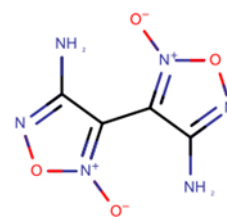

1. 814 8740 32. 6 170 E  
uropean Journal of In  
organic Chemistry, 20  
14, 2014(34): 5808–58  
11

220

221

222



|                                                                                                                                                                      |                                                                                                                                                                                  |                                                                                                                                                                          |
|----------------------------------------------------------------------------------------------------------------------------------------------------------------------|----------------------------------------------------------------------------------------------------------------------------------------------------------------------------------|--------------------------------------------------------------------------------------------------------------------------------------------------------------------------|
| 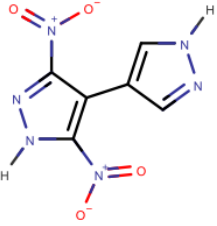 <p>1. 813 7873 24.9 302 New J. Chem., 2019, 43 (3): 1305-1312</p>                  |  <p>1. 812 8604 32.57 148 Chinese Journal of Explosives and Propellants, 2013, 36(4): 13-17</p> |  <p>1. 811 8936 34.6 140 RSC Adv., 2016, 6, 91477-91482</p>                           |
| <p>223</p>  <p>1. 811 8750 31.8 159 J. Mater. Chem. A, 2016, 4(36): 13923-13929</p> | <p>224</p>  <p>1. 81 8083 27.4 176 Z. Anorg. Allg. Chem. 2014, 84-92</p>                        | <p>225</p>  <p>1. 81 8100 18.4 / Propellants Explos. Pyrotech., 2002, 27(1): 7-11</p> |
| <p>226</p>  <p>1. 81 8630 31.5 167 J. Mater. Chem. A, 2016, 4, 3879-3885</p>      | <p>227</p>  <p>1. 81 8745 34.3 116 J. Mater. Chem. A, 2014, 2, 3200-3208</p>                  | <p>228</p>  <p>1. 81 8880 33.2 132 J. Mater. Chem. A, 2019, 7(13): 7875-7884</p>    |
| <p>229</p>                                                                                                                                                           | <p>230</p>                                                                                                                                                                       | <p>231</p>                                                                                                                                                               |

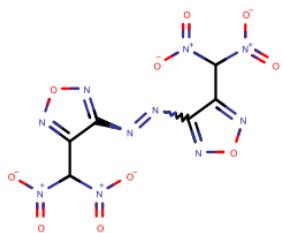

1. 81 8936 34.6 140 J. Mater. Chem. A, 2018, 6, 1915-1940

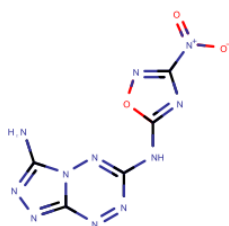

1. 81 8555 30 222 Chemistry-An Asian Journal, 2018, 13(23): 3718-3722.

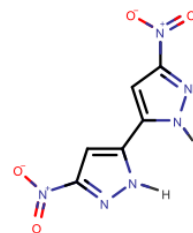

1. 81 8026 26.2 376 Chem. Eur. J. 2018, 24, 17220 - 17224

231

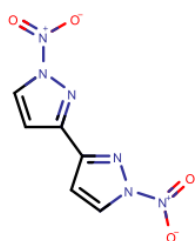

1. 81 8301 28.8 183 Chem. Eur. J. 2018, 24, 17220 - 17224

232

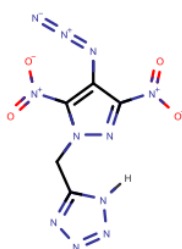

1. 81 8707 32.1 148 Chem. Eur. J. 2017, 23, 7876 - 7881

233

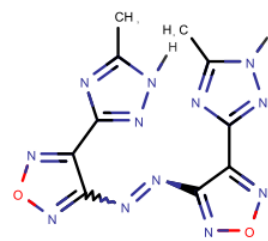

1. 81 8482 26.4 350 Chem. Eur. J. 2016, 22, 12527-12532

234

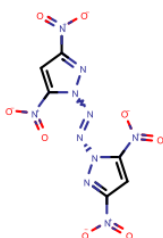

1. 81 8928 34.8 240 Chem. Eur. J. 2014, 20, 6707- 6712

235

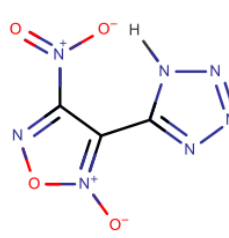

1. 81 8681 34.3 169 Chem. Eur. J. 2013, 19, 14902 - 14910

236

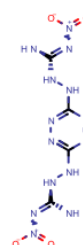

1. 81 8884 33.7 201 Chem. Asian J. 2014, 9, 212 - 217

237

238

239

|                                                                                                                                                                    |                                                                                                                                                               |                                                                                                                                                                  |
|--------------------------------------------------------------------------------------------------------------------------------------------------------------------|---------------------------------------------------------------------------------------------------------------------------------------------------------------|------------------------------------------------------------------------------------------------------------------------------------------------------------------|
| 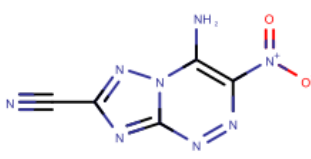 <p>1. 805 7763 23.05 / Propellants Explos. Pyrotech. 2017, 42, 238-242</p>       |  <p>1. 805 8764 33.2 123 Chem. Eur. J. 2017, 23, 16401-16407</p>             |  <p>1. 802 8332 29.6 310 Angew. Chem. Int. Ed. 2016, 55, 16132-16135</p>      |
| <p>240</p>  <p>1. 801 8018 26.8 255.53 New J. Chem., 2017, 41(13): 5764-5769.</p> | <p>241</p>  <p>1. 8 8490 33.1 169.9 RSC Adv., 2016, 6, 34921-34934</p>       | <p>242</p>  <p>1. 8 8637 32.23 221.68 New J. Chem., 2018, 42, 19671-19677</p> |
| <p>243</p>  <p>1. 8 8577 30.9 242 J. Mater. Chem. A, 2016, 4, 3879-3885</p>     | <p>244</p>  <p>1. 8 8690 32.2 96 J. Mater. Chem. A, 2016, 4, 9931-9940</p> | <p>245</p>  <p>1. 8 8834 34.6 195 J. Mater. Chem. A, 2018, 6, 1915-1940</p> |
| <p>246</p>                                                                                                                                                         | <p>247</p>                                                                                                                                                    | <p>248</p>                                                                                                                                                       |

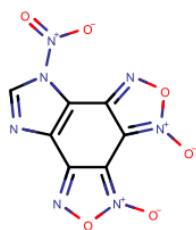

1.8 8402 29.78 148 Dalton Transactions, 2016, 45(35): 13827-13833.

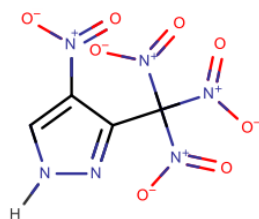

1.8 8598 32.2 154.2 Dalton Trans., 2019, 48, 1524

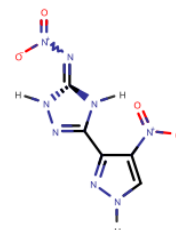

1.80 8336 27.8 205 Chemical Engineering Journal Volume 379, 1 January 2020, 122331

249

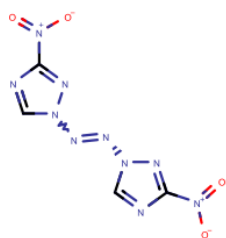

1.8 8825 33.5 247 Chem. Eur. J. 2014, 20, 6707- 6712

250

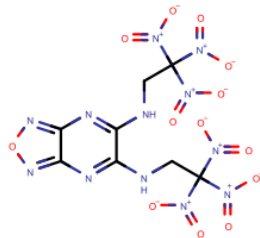

1.8 8409 32.1 190 Chem. Eur. J. 2014, 20, 542 - 548

251

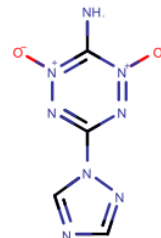

1.8 8438 27.7 221 Chem. Eur. J. 2014, 20, 16943 - 16952

252

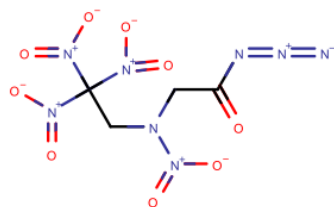

1.8 8591 34.2 89 Chem. Eur. J. 2013, 19, 15627 - 15638

253

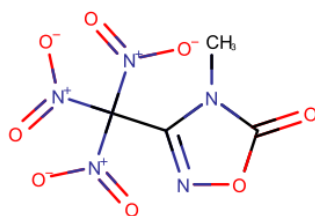

1.8 8804 34.6 119 Asian Journal of Organic Chemistry, 2018, 7(4): 739-750.

254

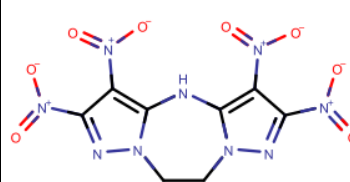

1.8 8257 29.2 307 Angew. Chem. 2017, 129, 8960-8964

255

256

257

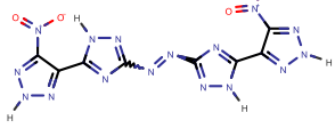

1. 796 8458 29 209.5 J.  
Mater. Chem. A, 2018, 6(5): 2239–2248.

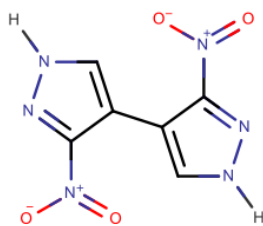

1. 794 7528 22.1 382 N  
ew J. Chem., 2019, 43  
(3): 1305–1312

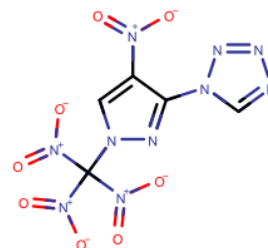

1. 794 8860 34 127 Che  
mistry – An Asian Jou  
rnal

258

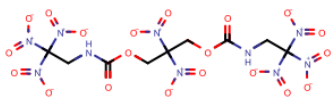

1. 79 8050 27.6 169 Z.  
Anorg. Allg. Chem. 2  
014, 84–92

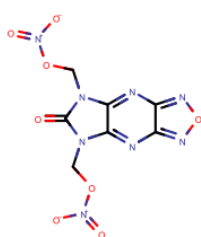

1. 79 8057 27.3 190 J.  
Mater. Chem. A, 2016,  
4, 7430–7436

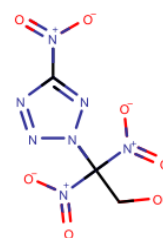

1. 79 8730 33 123.9 J.  
Mater. Chem. A, 2016,  
4, 5495–5504

261

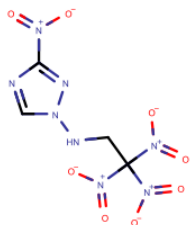

1. 79 8711 33.5 141 J.  
Mater. Chem. A, 2014,  
2, 3200–3208

262

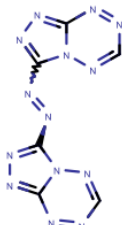

1. 79 9129 33.4 193 J.  
Mater. Chem. A

263

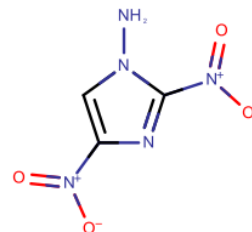

1. 79 8421 29.8 268.8  
ChemPlusChem 2017, 82  
, 287–294

264

265

266

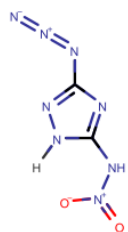

1.79 8972 35.7 143 Ch  
emistry-A European Jo  
urnal, 2011, 17(51):  
14485-14492

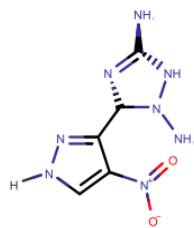

1.79 8255 24.6 281 Ch  
emical Engineering Jo  
urnal Volume 379, 1 J  
anuary 2020, 122331

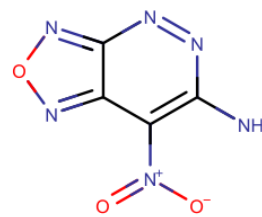

1.79 8396 29.4 186 Ch  
em. Eur. J. 2017, 23,  
15022-15025

267

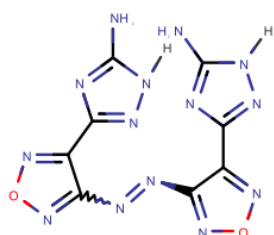

1.79 8458 26.2 309 Ch  
em. Eur. J. 2016, 22,  
12527-12532

268

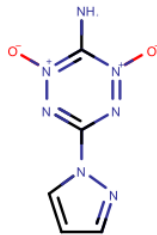

1.79 8304 26.4 237 Ch  
em. Eur. J. 2014, 20,  
16943 - 16952

269

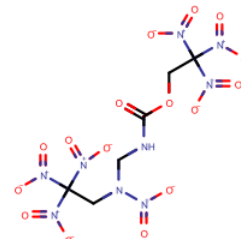

1.79 8340 31.9 170 Ch  
em. Eur. J. 2013, 19,  
15627 - 15638

270

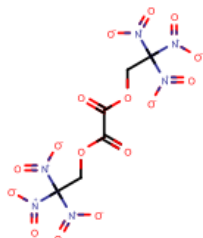

1.84 8275 28.6 186 Eu  
ropean Journal of Ino  
rganic Chemistry, 201  
6, 2016(19): 3086-309  
3.

271

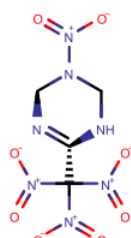

1.79 8786 34.5 136 Ch  
em. Commun., 2018, 54,  
9333-9336

272

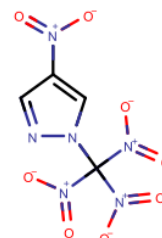

1.79 8653 33.98 132 C  
hem. Asian J. 2015, 1  
0, 1987 -1996

273

274

275

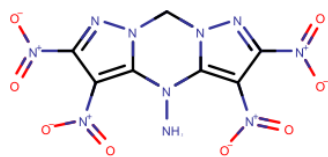

1.79 8356 29.6 242 An  
gew. Chem. 2017, 129,  
8960–8964

276

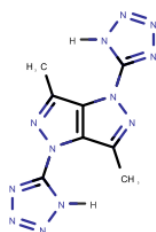

1.79 8721 30.9 281 AC  
S Appl. Mater. Interf  
aces 2019, 11, 45914–  
45921

277

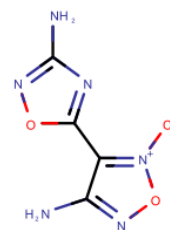

1.788 8193 26.8 219 O  
rganic letters, 2018,  
20(24): 8039–8042.

278

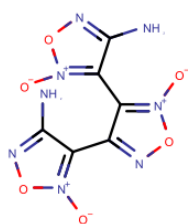

1.787 8480 31 183.6 J  
. Mater. Chem. A, 201  
8, 6, 9391–9396

279

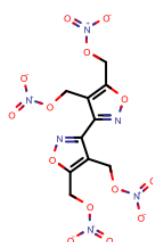

1.786 7837 27.1 193.7  
Eur. J. Org. Chem. 2  
017, 1765–1768

280

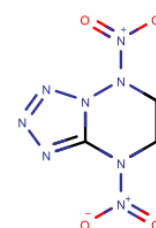

1.782 8900 34.14 96.6  
Materials and Design  
90 (2016) 1050–1058

281

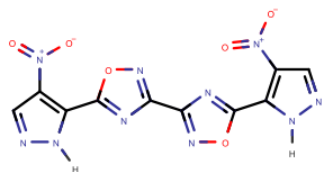

1.782 7991 25.2 317 C  
hemPlusChem, 2019, 84  
(10), 1567 – 1577

282

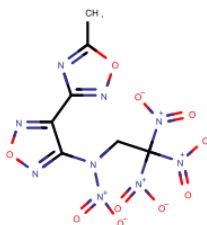

1.78 8602 32.8 172 Ne  
w J. Chem., 2017, 41, 12  
02–1211

283

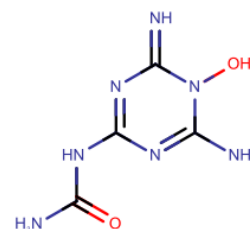

1.78 8167 22.4 275 Ne  
w J. Chem., 2019, 43,  
10675–10679

284

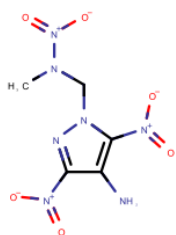

1.78 8482 29.8 165 Ne  
w J. Chem., 2016, 40,  
6059–6069

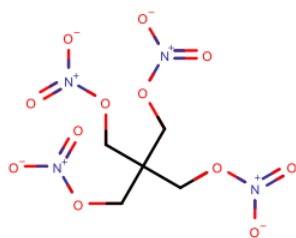

1.78 8564 31.4 160 J.  
Mater. Chem. A, 2016,  
4, 7430–7436

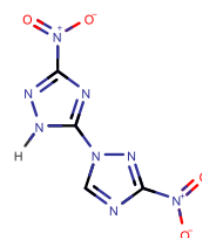

1.78 8364 29 250 J. M  
ater. Chem. A, 2016, 4  
, 3879–3885

285

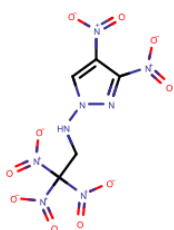

1.78 8667 33.1 110 J.  
Mater. Chem. A, 2014,  
2, 3200–3208

286

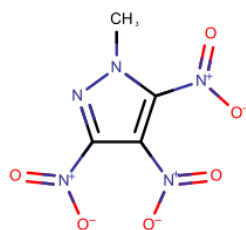

1.78 8253 31.2 285 J.  
Mater. Chem. A, 2013  
, 1, 2863–2868

287

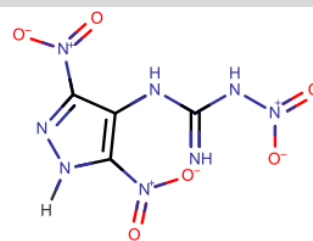

1.78 8390 31.4 233 J.  
Mater. Chem. A, 2013  
, 1, 2863–2868

288

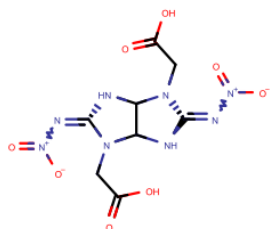

1.78 7660 25.9 / Eur.  
J. Org. Chem. 2019,  
988–994

289

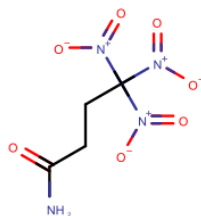

1.78 8187 29.2 120 Da  
lton Transactions, 20  
16, 45(47): 18909–189  
20.

290

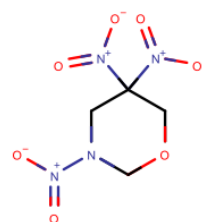

1.78 8322 31 231 Chem  
PlusChem 2019, 84, 91  
3–91

291

292

293



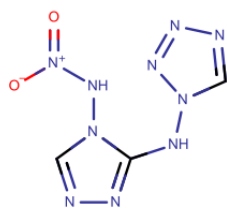

1.78 9141 33.6 177 Ch  
 emical Engineering Jo  
 urnal, Volume 386, 15  
 April 2020, 124027

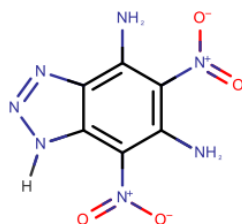

1.78 7916 23.9 322 Ch  
 em. Eur. J. 2015, 21, 1  
 6073 -16082

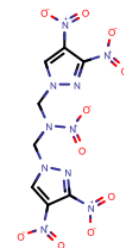

1.78 8265 31 261 Chem  
 . Eur. J. 2013, 19, 8  
 929 - 8936

294

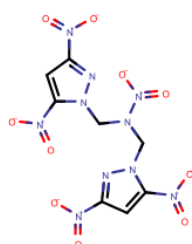

1.78 8258 30.9 250 Ch  
 em. Eur. J. 2013, 19,  
 8929 - 8936

295

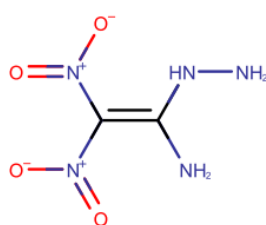

1.78 8803 33.8 124.5  
 Chem. Eur. J. 2011 17  
 4613-4618

296

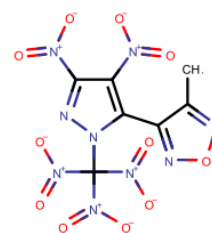

1.779 8320 31.1 141 P  
 ropellants Explos. Py  
 rotech. 2016, 41, 789-  
 792

297

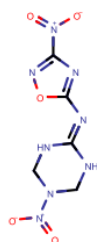

1.775 8013 28.24 269  
 Chem. Eur. J. 2012, 1  
 8, 1886 - 1889

298

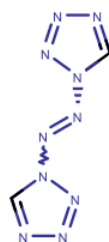

1.774 9185 36.1 80 Ch  
 em. Eur. J. 2014, 20,  
 6707- 6712

299

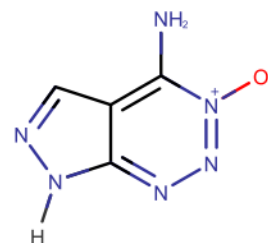

1.772 8271 25.6 221 A  
 CS Appl. Energy Mater  
 . 2019, 2, 8871-8877

300

301

302

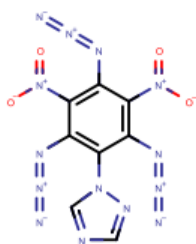

1.77 7500 24.67 132 R  
SC Adv., 2018, 8, 220  
3-2208

303

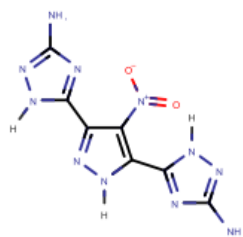

1.77 8024 23.1 353.6  
New J. Chem., 2019, 4  
3, 16300

304

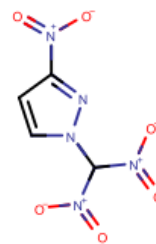

1.77 8530 32.1 135.8  
J. Mater. Chem. A, 201  
6, 4, 5495-5504

305

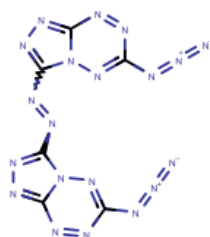

1.77 8690 30.2 183 J.  
Mater. Chem. A, 2019  
, 7(13): 7875-7884

306

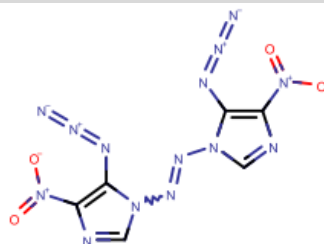

1.77 8702 31.4 154 J.  
Mater. Chem. A, 2018  
, 6, 1915-1940

307

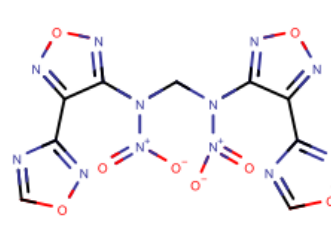

1.77 8182 27.7 149 J.  
Mater. Chem. A, 2016  
, 4, 16961-16967

308

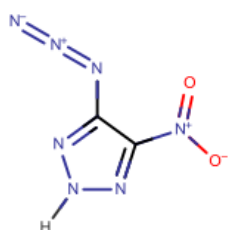

1.77 8669 32.9 149 J.  
Mater. Chem. A, 2013  
, 1, 585-593

309

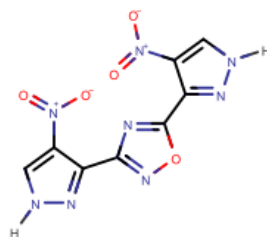

1.77 8027 26.4 314 Ch  
emPlusChem, 2019, 84(  
10), 1567 - 1577

310

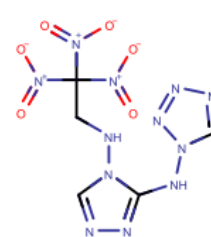

1.77 9004 34.9 182 Ch  
emical Engineering Jo  
urnal, Volume 386, 15  
April 2020, 124027

311

|                                                                                                                                                                                 |                                                                                                                                                                                 |                                                                                                                                                                                            |
|---------------------------------------------------------------------------------------------------------------------------------------------------------------------------------|---------------------------------------------------------------------------------------------------------------------------------------------------------------------------------|--------------------------------------------------------------------------------------------------------------------------------------------------------------------------------------------|
| 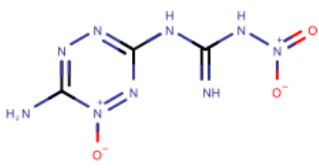 <p>1. 77 8580 29.1 177 Ch<br/>em. Eur. J. 2014, 20,<br/>16943 - 16952</p>                     |  <p>1. 77 7160 19.41 356 A<br/>ngew. Chem. Int. Ed.<br/>2012, 51, 9881 -9885</p>               |  <p>1. 767 8409 29.3 248 C<br/>ryst. Growth Des., 20<br/>19, 19, 839-844</p>                            |
| <p>312</p>  <p>1. 766 8433 32 80 Z. An<br/>org. Allg. Chem. 2011<br/>, 1453-1457</p>           | <p>313</p>  <p>1. 766 8013 28.16 290<br/>Chem. Eur. J. 2012, 1<br/>8, 1886 - 1889</p>          | <p>314</p>  <p>1. 762 8843 31.4 192 P<br/>ropellants Explos. Py<br/>rotech. 2014, 39, 550<br/>- 557</p> |
| <p>315</p>  <p>1. 762 8384 27.4 263.3<br/>2 J. Mater. Chem. A,<br/>2018, 6(5): 2239-2248</p> | <p>316</p>  <p>1. 762 8135 28.1 261 J<br/>. Mater. Chem. A, 201<br/>8, 6(18): 8382-8387.</p> | <p>317</p>  <p>1. 76 9260 37.92 170.8<br/>1 Molecules 2012, 17,<br/>5040-5049</p>                     |
| <p>318</p>                                                                                                                                                                      | <p>319</p>                                                                                                                                                                      | <p>320</p>                                                                                                                                                                                 |

|                                                                                                                                                                                 |                                                                                                                                                                                 |                                                                                                                                                                  |
|---------------------------------------------------------------------------------------------------------------------------------------------------------------------------------|---------------------------------------------------------------------------------------------------------------------------------------------------------------------------------|------------------------------------------------------------------------------------------------------------------------------------------------------------------|
|  <p>1.76 8504 31 252 Journal of the American Chemical Society, 2017, 139(39): 13684–13687.</p> |  <p>1.76 8440 27.4 244 J. Mater. Chem. A, 2014, 2, 3200–3208</p>                               |  <p>1.76 8434 30.7 225 J. Mater. Chem. A, 2014, 2, 3200–3208</p>              |
| <p>321</p>  <p>1.76 8652 29.6 178 J. Mater. Chem. A, 2017, 5, 16767–16775</p>                 | <p>322</p>  <p>1.76 8621 30.4 148 J. Am. Chem. Soc., 2018, 140, 15001–15007</p>                | <p>323</p>  <p>1.76 8532 30.8 117 Dalton Trans., 2020, 49, 1660–1667</p>     |
| <p>324</p>  <p>1.76 8363 29.2 120 Dalton Trans., 2019, 48, 7677–7684</p>                     | <p>325</p>  <p>1.76 8532 29.9 229.1 Chemistry-An Asian Journal, 2018, 13(23): 3718–3722.</p> | <p>326</p>  <p>1.76 8180 23.6 252 Chem. Eur. J. 2014, 20, 16943 – 16952</p> |
| <p>327</p>                                                                                                                                                                      | <p>328</p>                                                                                                                                                                      | <p>329</p>                                                                                                                                                       |

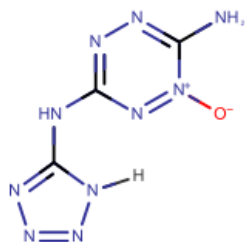

1. 76 8429 27.3 192 Ch  
em. Eur. J. 2014, 20,  
16943 – 16952

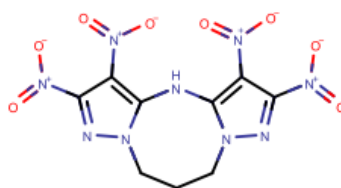

1. 76 8051 27.2 276 An  
gew. Chem. 2017, 129,  
8960-8964

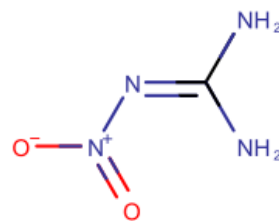

1. 759 8344 29 254 Pro  
pellants Explos. Pyro  
tech. 2019, 44, 1-27

330

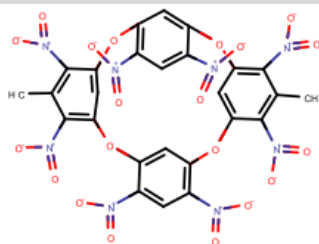

1. 757 7619 24.6 358.2  
3 New J. Chem., 2017,  
41(13): 5764-5769.

331

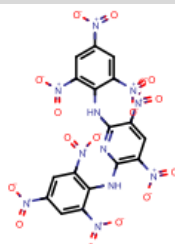

1. 757 7757 25.1 360 C  
hemPlusChem 2016, 81,  
357 -360

332

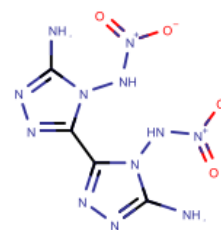

1. 756 8846 31.2 259 C  
hem.AsianJ. 2016, 11,  
844 -851

333

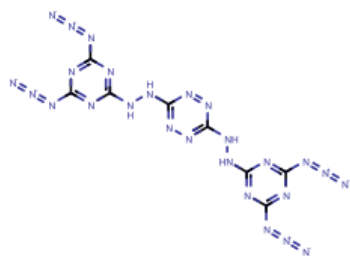

1. 755 8365 26.8 193.9  
Angew. Chem. 2018, 1  
30, 2103-2106

334

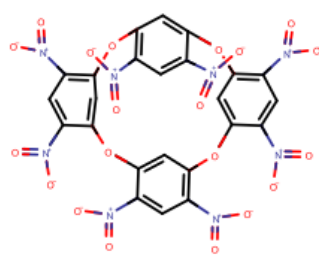

1. 753 7885 27.6 375.5  
New J. Chem., 2017,  
41(13): 5764-5769.

335

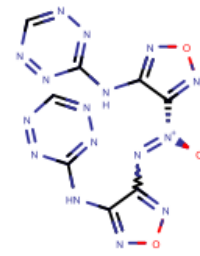

1. 75 8401 28.3 232 J.  
Org. Chem. 2019, 84,  
16019-16026

336

337

338

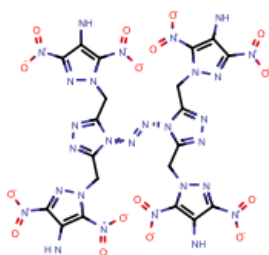

1.75 8190 27.3 214 J. Mater. Chem. A, 2018, 6, 1915–1940

339

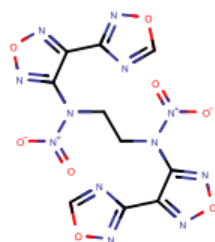

1.75 8185 27.9 175 J. Mater. Chem. A, 2016, 4, 16961–16967

340

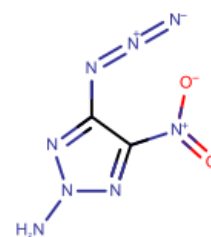

1.75 8756 33 141 J. Mater. Chem. A, 2013, 1, 585–593

341

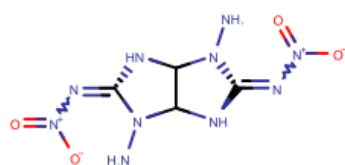

1.75 8660 32.7 / European Journal of Organic Chemistry, 2019, 2019(5): 988–994

342

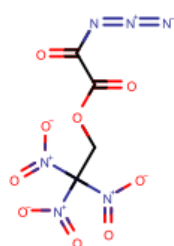

1.75 8223 28 50 European Journal of Inorganic Chemistry, 2016, 2016(19): 3086–3093.

343

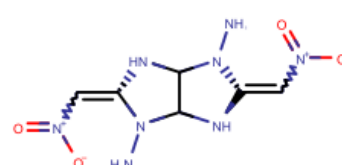

1.75 8660 32.7 / Eur. J. Org. Chem. 10.1002/ejoc.201801525

344

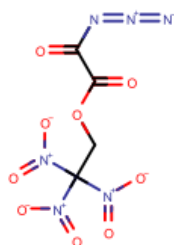

1.75 8223 28 50 European Journal of Inorganic Chemistry, 2016, 2016(19): 3086–3093.

345

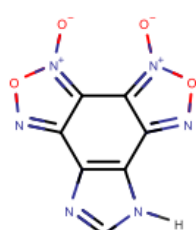

1.75 7843 24.85 199 Dalton Transactions, 2016, 45(35): 13827–13833.

346

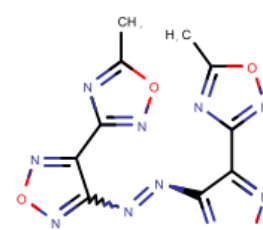

1.75 7781 22.6 271 Chem. Eur. J. 2016, 22, 12527–12532

347

|                                                                                         |                                                                                     |                                                                                      |
|-----------------------------------------------------------------------------------------|-------------------------------------------------------------------------------------|--------------------------------------------------------------------------------------|
| 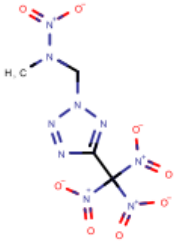       |    |   |
| <p>1.75 8704 33.4 134 Chem. Eur. J. 2015, 21, 3755 – 3765</p>                           | <p>1.75 8263 27.9 200 Chem. Asian J. 2014, 9, 212 – 217</p>                         | <p>1.747 8102 26.9 155 Cryst. Growth Des., 2019, 19, 839–844</p>                     |
| <p>348</p>                                                                              | <p>349</p>                                                                          | <p>350</p>                                                                           |
|        |    |   |
| <p>1.747 8020 29.9 252 Chinese Journal of Energetic Materials, 2005, 13(3): 192–195</p> | <p>1.744 7787 26.4 152 New J. Chem., 2019, 43(14): 5441–5447</p>                    | <p>1.743 8008 23.3 227 ACS Appl. Energy Mater., 2019, 2, 8871–8877</p>               |
| <p>351</p>                                                                              | <p>352</p>                                                                          | <p>353</p>                                                                           |
|      |  |  |
| <p>1.741 8236 28.2 180.5 Angew. Chem. Int. Ed. 2017, 56, 5877 –5881</p>                 | <p>1.74 7934 27.9 178 RSC Adv., 2016, 6, 84760–84768</p>                            | <p>1.74 8040 29 173.7 RSC Adv., 2016, 6, 34921–34934</p>                             |
| <p>354</p>                                                                              | <p>355</p>                                                                          | <p>356</p>                                                                           |

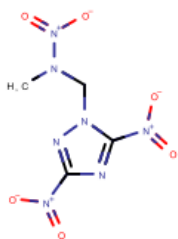

1.74 8471 30.5 165 Ne  
w J. Chem., 2016, 40,  
6059–6069

357

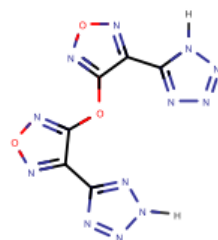

1.74 7977 26.5 240 J.  
Mater. Chem., 2012,  
22, 21954–21964

358

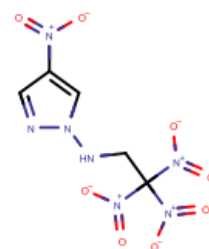

1.74 8390 30.8 112 J.  
Mater. Chem. A, 2014,  
2, 3200–3208

359

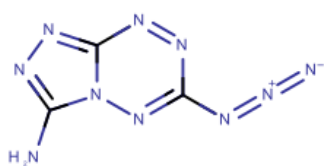

1.74 8581 28.5 165 J.  
Mater. Chem. A, 2019  
, 7(13): 7875–7884

360

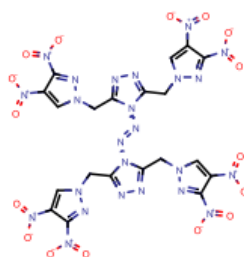

1.74 8070 26.9 162 J.  
Mater. Chem. A, 2018  
, 6, 1915–1940

361

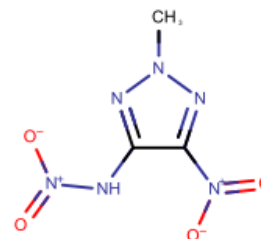

1.74 8350 30 112 J. M  
ater. Chem. A, 2013,  
1, 585–593

362

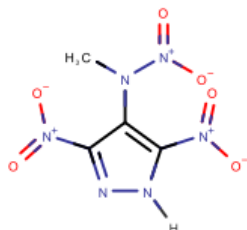

1.74 8220 30.1 178 J.  
Mater. Chem. A, 2013  
, 1, 2863–2868

363

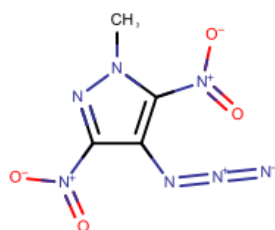

1.74 8409 31 161 J. M  
ater. Chem. A, 2013,  
1, 2863–2868

364

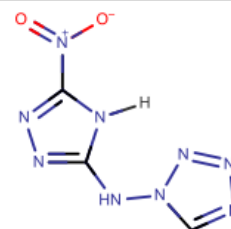

1.74 8885 32.1 186 Ch  
emical Engineering Jo  
urnal, Volume 386, 15  
April 2020, 124027

365



|                                                                                             |                                                                                     |                                                                                                             |
|---------------------------------------------------------------------------------------------|-------------------------------------------------------------------------------------|-------------------------------------------------------------------------------------------------------------|
| 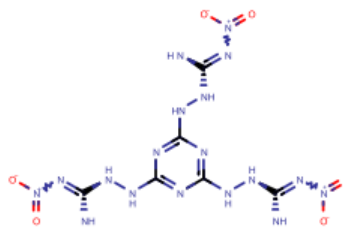           |    |                          |
| <p>1. 74 8378 28. 7 195 Ch<br/>em. Asian J. 2014, 9,<br/>212 - 217</p>                      | <p>1. 74 8332 27. 7 195. 5<br/>Angew. Chem. Int. Ed.<br/>2017, 56, 5877-5881</p>    | <p>1. 737 7224 23. 1 325. 2<br/>Chinese Journal of E<br/>nergetic Materials, 20<br/>20, 28(3) :177-181.</p> |
| <p>366</p>                                                                                  | <p>367</p>                                                                          | <p>368</p>                                                                                                  |
|            |    |                          |
| <p>1. 733 7838 24. 1 307 J<br/>. Mater. Chem. A, 201<br/>8, 6(18): 8382-8387.</p>           | <p>1. 73 8300 29. 2 164 Z.<br/>Anorg. Allg. Chem. 2<br/>016, 887-895</p>            | <p>1. 73 7980 23. 4 355 RS<br/>C Adv., 2014, 4, 50361-<br/>50364</p>                                        |
| <p>369</p>                                                                                  | <p>370</p>                                                                          | <p>371</p>                                                                                                  |
|          |  |                        |
| <p>1. 73 7821 20. 3 293 Pr<br/>opellants Explos. Pyr<br/>otech. 2015, 40, 426 -<br/>432</p> | <p>1. 73 8184 27. 7 190 Ne<br/>w J. Chem., 2016, 40,<br/>6059-6069</p>              | <p>1. 73 8322 26. 4 231 J.<br/>Org. Chem. 2019, 84,<br/>16019-16026</p>                                     |
| <p>372</p>                                                                                  | <p>373</p>                                                                          | <p>374</p>                                                                                                  |

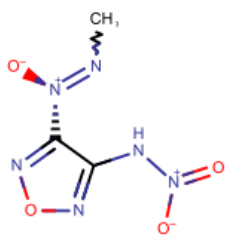

1.73 8644 32 141 J. Mater. Chem. A, 2016, 4, 16961-16967

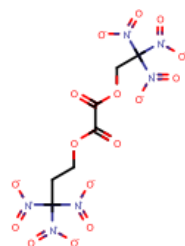

1.73 8071 27 168 European Journal of Inorganic Chemistry, 2016, 2016(19): 3086-3093.

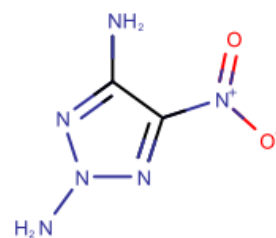

1.73 8511 28 212.1 Chem. Commun., 2016, 52, 8123-8126

375

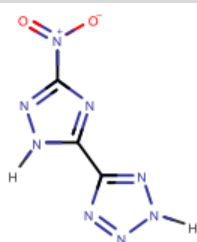

1.73 8020 26.5 211 Chem. Asian J. 2013, 8, 1463 - 1471

376

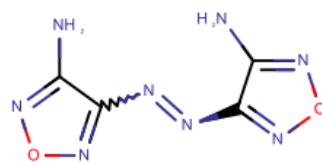

1.728 7600 26.2 315 Chinese Journal of Energetic Materials, 2005, 13(3): 192-195

377

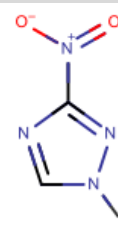

1.727 8255 28.9 218 Molecules, 2014, 19(1): 896-910

378

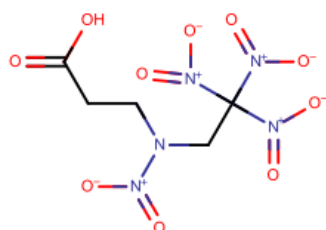

1.72 7987 27.7 146 Z. Anorg. Allg. Chem. 2016, 887-895

379

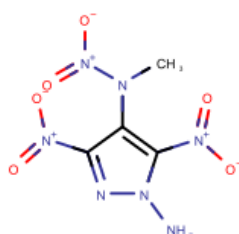

1.72 8306 30.2 176 J. Mater. Chem. A, 2013, 1, 2863-2868

380

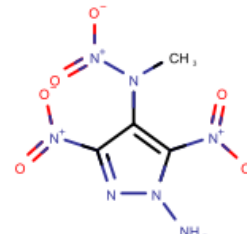

1.72 8306 30.2 176 J. Mater. Chem. A, 2013, 1, 2863-2868

381

382

383

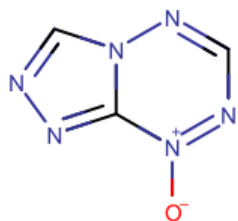

1. 72 8292 27 220 Chem  
ical Engineering Jour  
nal, Volume 386, 15 A  
pril 2020, 124027

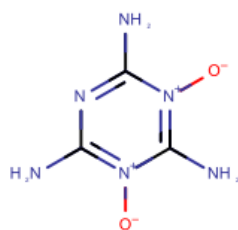

1. 72 6924 20. 7 / Chem  
ical Engineering Jour  
nal Volume 395, 1 Sep  
tember 2020, 125114

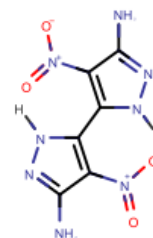

1. 72 7779 23 228 Chem  
. Commun., 2018, 54, 1  
0566-10569

384

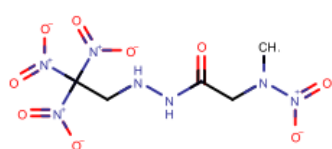

1. 72 8304 29. 3 108 Ch  
em. Asian J. 2016, 11  
, 3134 -3144

385

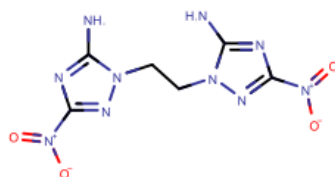

1. 72 8069 24. 5 307 An  
gew. Chem. Int. Ed. 2  
014, 53, 12889 -12892

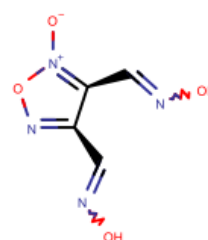

1. 72 8236 29. 6 168 Pr  
opellants Explos. Pyr  
otech. 2011, 36, 160-  
167

387

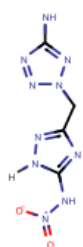

1. 718 8213 25. 2 218 J  
. Mater. Chem. A, 201  
6, 4(36): 13923-13929

388

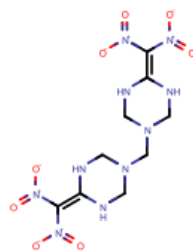

1. 712 8332 26. 47 188  
New J. Chem., 2019, 4  
3, 10429-10433

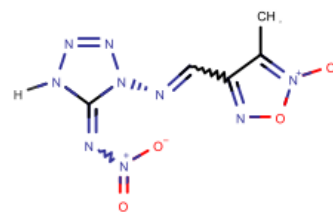

1. 711 8060 27. 94 146  
Eur. J. Inorg. Chem.  
2014, 1231-1238

390

391

392

|                                                                                                      |                                                                                         |                                                                                                         |
|------------------------------------------------------------------------------------------------------|-----------------------------------------------------------------------------------------|---------------------------------------------------------------------------------------------------------|
| 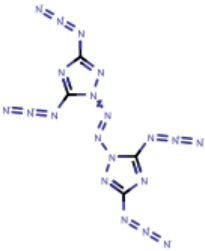                    |        |                      |
| <p>1.71 8220 29.6 168.8<br/>RSC Adv., 2018, 8, 13<br/>755-13763</p>                                  | <p>1.71 8118 27.7 200 Ne<br/>w J. Chem., 2017, 41, 12<br/>02-1211</p>                   | <p>1.71 8172 27.1 135 J.<br/>Mater. Chem. A, 2016,<br/>4, 9220-9228</p>                                 |
| 393                                                                                                  | 394                                                                                     | 395                                                                                                     |
|                     |        |                      |
| <p>1.71 8292 27.6 196 J.<br/>Mater. Chem. A, 2016,<br/>4, 7430-7436</p>                              | <p>1.71 8309 29.3 241 J<br/>Mater. Chem. A, 2014<br/>2, 3200-3208</p>                   | <p>1.71 7427 19 267 J. A<br/>m. Chem. Soc. 2020, 1<br/>42, 7153-7160</p>                                |
| 396                                                                                                  | 397                                                                                     | 398                                                                                                     |
|                   |      |                    |
| <p>1.71 7340 23.8 / Euro<br/>pean Journal of Organ<br/>ic Chemistry, 2019, 2<br/>019(5): 988-994</p> | <p>1.71 8259 29.1 85 Dal<br/>ton Transactions, 201<br/>6, 45(47): 18909-1892<br/>0.</p> | <p>1.71 8695 28.4 183 Ch<br/>emical Engineering Jo<br/>urnal, Volume 386, 15<br/>April 2020, 124027</p> |
| 399                                                                                                  | 400                                                                                     | 401                                                                                                     |

|                                                                                                                                                                              |                                                                                                                                                                               |                                                                                                                                                                          |
|------------------------------------------------------------------------------------------------------------------------------------------------------------------------------|-------------------------------------------------------------------------------------------------------------------------------------------------------------------------------|--------------------------------------------------------------------------------------------------------------------------------------------------------------------------|
| 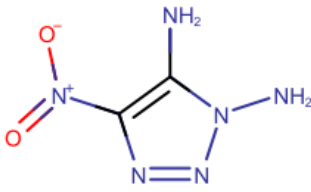 <p>1.71 8451 27.4 193.9<br/>Chem. Commun., 2016,<br/>52, 8123–8126</p>                     |  <p>1.71 7835 25.5 150 Ch<br/>em. Asian J. 2016, 11<br/>, 3134 –3144</p>                     |  <p>1.71 7812 23.9 201 Ch<br/>em. Asian J. 2014, 9,<br/>212 – 217</p>                 |
| <p>399</p>  <p>1.71 8097 26.6 215 Ch<br/>em. Asian J. 2013, 8,<br/>1463 – 1471</p>          | <p>400</p>  <p>1.708 8187 24.9 204 J<br/>. Mater. Chem. A, 201<br/>6, 4(36): 13923–13929</p> | <p>401</p>  <p>1.706 8254 28 138 Che<br/>m. Eur. J. 2009, 15,<br/>5775 – 5792</p>     |
| <p>402</p>  <p>1.704 8125 26 196.3 A<br/>ngew. Chem. Int. Ed.<br/>2017, 56, 5877–5881</p> | <p>403</p>  <p>1.7 8285 29.1 65 Z. A<br/>norg. Allg. Chem. 201<br/>6, 887–895</p>          | <p>404</p>  <p>1.7 8062 26.2 215 Z.<br/>Anorg. Allg. Chem. 20<br/>13, 2171–2180</p> |
| <p>405</p>  <p>1.7 7919 25.4 211 Z.<br/>Anorg. Allg. Chem. 20<br/>13, 2171–2180</p>       | <p>406</p>  <p>1.7 7986 25.8 264 New<br/>J. Chem., 2016, 40,<br/>6059–6069</p>             | <p>407</p>  <p>1.7 8046 26.3 183 New<br/>J. Chem., 2016, 40,<br/>6059–6069</p>      |

|                                                                                     |                                                                                     |                                                                                       |
|-------------------------------------------------------------------------------------|-------------------------------------------------------------------------------------|---------------------------------------------------------------------------------------|
| 408                                                                                 | 409                                                                                 | 410                                                                                   |
| 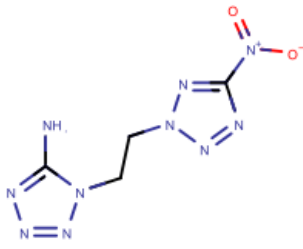   |    |    |
| 1.7 8279 25.6 234 J. Mater. Chem. A, 2016, 4, 9931-9940                             | 1.7 8185 26.1 159 J. Mater. Chem. A, 2016, 4, 9931-9940                             | 1.7 8190 28.5 / J. Mater. Chem. A, 2018, 6, 1915-1940                                 |
| 411                                                                                 | 412                                                                                 | 413                                                                                   |
|    |    |    |
| 1.7 8126 28.5 / J. Mater. Chem. A, 2013, 1, 585-593                                 | 1.7 7488 19.3 276 J. Am. Chem. Soc. 2020, 142, 7153-7160                            | 1.7 8038 20.6 401 Dalton Trans., 2018, 47, 13391-13401                                |
| 414                                                                                 | 415                                                                                 | 416                                                                                   |
|  |  |  |
| 1.7 6796 18 143 ChemistrySelect 2016, 1, 4057-4061                                  | 1.7 7672 22.2 260 Chem. Asian J. 2014, 9, 212 - 217                                 | 1.695 8079 24.9 196.8 Angew. Chem. Int. Ed. 2017, 56, 5877 -5881                      |
| 417                                                                                 | 418                                                                                 | 419                                                                                   |

|                                                                                                                                                                  |                                                                                                                                                            |                                                                                                                                                               |
|------------------------------------------------------------------------------------------------------------------------------------------------------------------|------------------------------------------------------------------------------------------------------------------------------------------------------------|---------------------------------------------------------------------------------------------------------------------------------------------------------------|
| 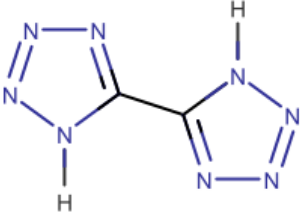 <p>1. 693 8109 23.5 255 A<br/>CS Appl. Energy Mater<br/>, 2018, 1, 589–593</p> |  <p>1. 69 7941 24.4 151 Ne<br/>w J. Chem., 2016, 40,<br/>6059–6069</p>    |  <p>1. 69 8113 25.6 181 J.<br/>Mater. Chem. A, 2016,<br/>4, 9931–9940</p>  |
| 420                                                                                                                                                              | 421                                                                                                                                                        | 422                                                                                                                                                           |
|  <p>1. 69 8251 26.3 188 Da<br/>lton Trans., 2015, 44,<br/>17054–17063</p>       |  <p>1. 69 8037 25 143 Dalt<br/>on Trans., 2017, 46, 1<br/>4210–14218</p>  |  <p>1. 69 6757 17 141 Chem<br/>istrySelect 2016, 1,<br/>4057–4061</p>      |
| 423                                                                                                                                                              | 424                                                                                                                                                        | 425                                                                                                                                                           |
|  <p>1. 69 8290 29.4 154.6<br/>Chem. Eur. J. 2016, 22<br/>, 10590 –10596</p>   |  <p>1. 69 8477 28 258 Chem<br/>. Eur. J. 2016, 22, 1<br/>2527–12532</p> |  <p>1. 69 7867 25.1 262 Ch<br/>em. Eur. J. 2013, 19,<br/>8929 – 8936</p> |
| 426                                                                                                                                                              | 427                                                                                                                                                        | 428                                                                                                                                                           |

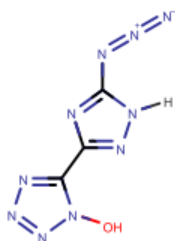

1.69 8239 27.5 144 Chem. Eur. J. 2013, 19, 12042 - 12051

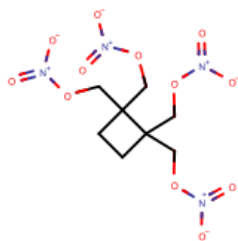

1.683 7604 24.6 192.8 J. Am. Chem. Soc. 2019, 141, 12531-12535

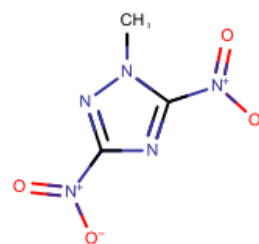

1.68 7960 26.3 / Propellants Explos. Pyrotech. 2016, 41, 789- 792

429

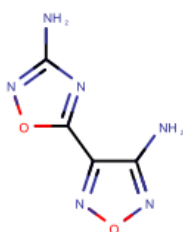

1.68 7495 20.4 249 Organic letters, 2018, 20(24): 8039-8042.

430

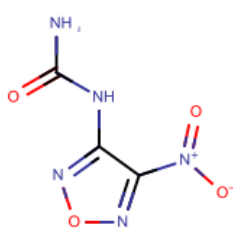

1.68 7759 23.6 182 Journal of Heterocyclic Chemistry, 2018, 55(4): 852-862.

431

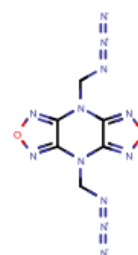

1.68 8323 27.8 188 J. Mater. Chem. A, 2016, 4, 7430-7436

432

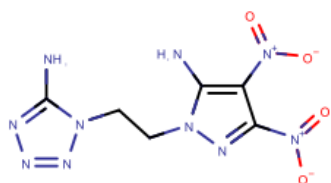

1.68 7883 23 239 J. Mater. Chem. A, 2016, 4, 9931-9940

433

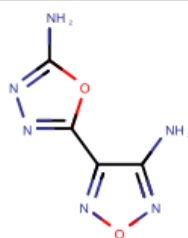

1.68 7493 20.4 246 J. Mater. Chem. A, 2015, 3, 23143-23148

434

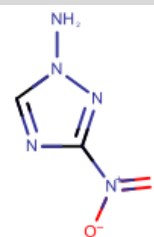

1.68 8174 25.9 306 J. Mater. Chem. A, 2014, 2, 3200-3208

435

436

437



|                                                                                                                                                                                 |                                                                                                                                                                                           |                                                                                                                                                                                             |
|---------------------------------------------------------------------------------------------------------------------------------------------------------------------------------|-------------------------------------------------------------------------------------------------------------------------------------------------------------------------------------------|---------------------------------------------------------------------------------------------------------------------------------------------------------------------------------------------|
| 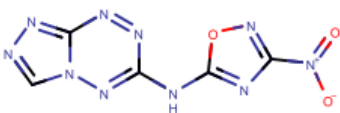 <p>1.68 8069 25.7 226.2<br/>Chemistry–An Asian Jo<br/>urnal, 2018, 13(23):<br/>3718–3722.</p> |  <p>1.68 8176 27.2 243 Ch<br/>emical Engineering Jo<br/>urnal, Volume 386, 15<br/>April 2020, 124027</p> |  <p>1.68 8599 27.6 170 Ch<br/>emical Engineering Jo<br/>urnal, Volume 386, 15<br/>April 2020, 124027</p> |
| 438                                                                                                                                                                             | 439                                                                                                                                                                                       | 440                                                                                                                                                                                         |
|  <p>1.68 7685 22.7 259 Ch<br/>em. Eur. J. 2016, 22,<br/>12527–12532</p>                        |  <p>1.68 7774 22.4 241 Ch<br/>em. Eur. J. 2016, 22,<br/>12527–12532</p>                                  |  <p>1.677 7700 24.1 280 J<br/>. Mater. Chem. A, 201<br/>8, 6(18): 8382–8387.</p>                         |
| 441                                                                                                                                                                             | 442                                                                                                                                                                                       | 443                                                                                                                                                                                         |
|  <p>1.675 8185 28.33 137<br/>New J. Chem., 2019, 4<br/>3, 10429–10433</p>                    |  <p>1.67 8986 32.7 165 Z.<br/>Anorg. Allg. Chem. 2<br/>008, 634, 1051–1057</p>                         |  <p>1.67 6550 18.53 307 R<br/>SC Adv., 2018, 8, 220<br/>3–2208</p>                                     |
| 444                                                                                                                                                                             | 445                                                                                                                                                                                       | 446                                                                                                                                                                                         |

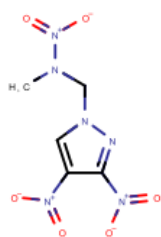

1.67 8003 25.9 234 Ne  
w J. Chem., 2016, 40,  
6059–6069

447

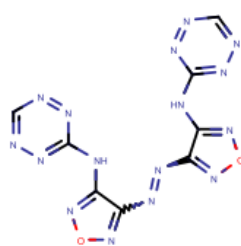

1.67 8075 25.1 219 J.  
Org. Chem. 2019, 84,  
16019–16026

448

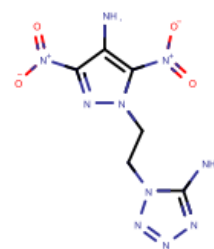

1.67 7889 23.2 257 J.  
Mater. Chem. A, 2016,  
4, 9220–9228

449

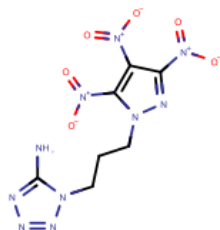

1.67 7959 24.7 134 J.  
Mater. Chem. A, 2016,  
4, 9220–9228

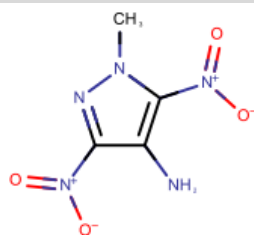

1.67 7800 24.6 270 J.  
Mater. Chem. A, 2013  
, 1, 2863–2868

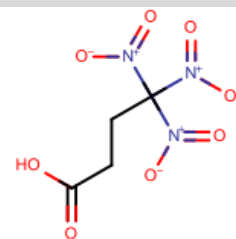

1.67 7624 24.6 176 Da  
lton Transactions, 20  
16, 45(47): 18909–189  
20.

450

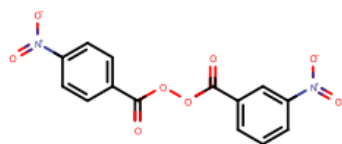

1.67 6395 9 125 Chemi  
strySelect 2016, 1, 4  
057–4061

451

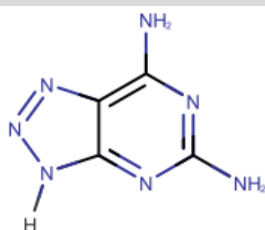

1.67 7426 18.16 365 C  
hemical Engineering J  
ournal Volume 404, 15  
January 2021, 126514

452

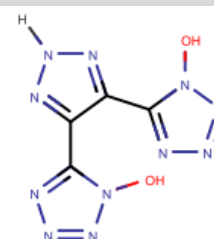

1.67 8277 26 246 Chem  
. Eur. J. 2016, 22, 176  
8–1778

453

454

455

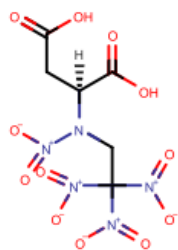

1.66 7515 23.4 160 Z.  
Anorg. Allg. Chem. 2016, 887–895

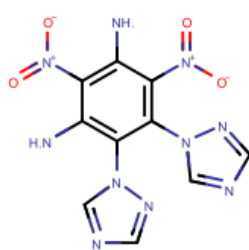

1.66 6560 18.67 314 R  
SC Adv., 2018, 8, 2203–2208

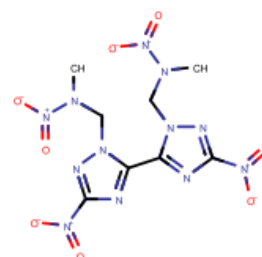

1.66 7919 24.2 228 Ne  
w J. Chem., 2016, 40, 6059–6069

456

457

458

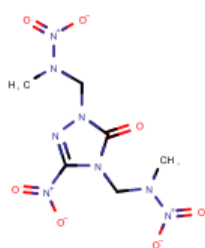

1.66 7925 23.7 211 Ne  
w J. Chem., 2016, 40, 6059–6069

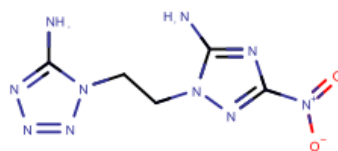

1.66 7807 21.6 277 J.  
Mater. Chem. A, 2016, 4, 9931–9940

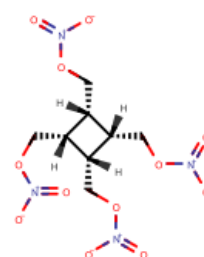

1.66 7504 24.5 194.3  
J. Am. Chem. Soc. 2019, 141, 12531–12535

459

460

461

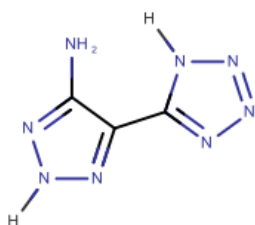

1.66 8397 23.7 241 Da  
lton Trans., 2015, 44, 17054–17063

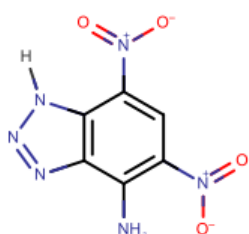

1.66 7302 19.8 341 Ch  
em. Eur. J. 2015, 21, 16073 –16082

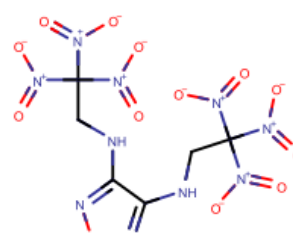

1.83 8998 36.3 160 J.  
Mater. Chem. A, 2015, 3, 8156–8164

462

463

464

|                                                                                                                                                                             |                                                                                                                                                                              |                                                                                                                                                                             |
|-----------------------------------------------------------------------------------------------------------------------------------------------------------------------------|------------------------------------------------------------------------------------------------------------------------------------------------------------------------------|-----------------------------------------------------------------------------------------------------------------------------------------------------------------------------|
| 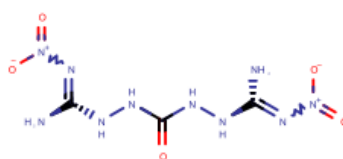 <p>1. 66 8138 26.5 206 Ch<br/>em. Asian J. 2014, 9,<br/>212 - 217</p>                     |  <p>1. 66 7874 24.1 164 Ch<br/>em. Asian J. 2013, 8,<br/>1463 - 1471</p>                    |  <p>1. 66 8660 31.5 116 An<br/>gew.Chem. Int.Ed., 201<br/>0, 49(40): 7320-7323</p>       |
| <p>465</p>  <p>1. 652 7547 21.6 213 O<br/>rganic letters, 2018,<br/>20(24): 8039-8042.</p> | <p>466</p>  <p>1. 651 7472 24.4 196.2<br/>J. Am. Chem. Soc. 20<br/>19, 141, 12531-12535</p> | <p>467</p>  <p>1. 65 7801 24.7 159 Z.<br/>Anorg. Allg. Chem. 2<br/>016, 887-895</p>      |
| <p>468</p>  <p>1. 65 7304 21.3 295 Ne<br/>w J. Chem., 2017, 41, 12<br/>02-1211</p>       | <p>469</p>  <p>1. 65 7810 24.1 159 Ne<br/>w J. Chem., 2017, 41, 12<br/>02-1211</p>        | <p>470</p>  <p>1. 65 7983 23.5 224 Ne<br/>w J. Chem., 2016, 40,<br/>6059-6069</p>      |
| <p>471</p>  <p>1. 65 7899 25 210 New<br/>J. Chem., 2016, 40, 6<br/>059-6069</p>          | <p>472</p>  <p>1. 65 7768 21.8 265 J.<br/>Mater. Chem. A, 2016,<br/>4, 9220-9228</p>      | <p>473</p>  <p>1. 65 7824 23.09 136 J<br/>. Mater. Chem. A, 2016<br/>, 4, 9220-9228</p> |

|                                                                                                                            |                                                                                                                            |                                                                                                                             |
|----------------------------------------------------------------------------------------------------------------------------|----------------------------------------------------------------------------------------------------------------------------|-----------------------------------------------------------------------------------------------------------------------------|
| <p style="text-align: center;">474</p>    | <p style="text-align: center;">475</p>    | <p style="text-align: center;">476</p>   |
| <p>1.65 8096 26.3 / J. Mater. Chem. A, 2013, 1, 585-593</p>                                                                | <p>1.65 8789 27.7 215 Chemical Engineering Journal, Volume 386, 15 April 2020, 124027</p>                                  | <p>1.65 7252 19.9 291 Chem. Eur. J. 2015, 21, 16073 -16082</p>                                                              |
| <p style="text-align: center;">477</p>    | <p style="text-align: center;">478</p>    | <p style="text-align: center;">479</p>  |
| <p>1.65 7980 23.2 154 Chem. Eur. J. 2009, 15, 4102 - 4110</p>                                                              | <p>1.65 7767 21.15 232 Angew. Chem. Int. Ed. 2008, 47, 6236 -6239</p>                                                      | <p>1.65 8255 24.06 223 Angew. Chem. Int. Ed. 2008, 47, 6236 -6239</p>                                                       |
| <p style="text-align: center;">480</p>  | <p style="text-align: center;">481</p>  | <p style="text-align: center;">482</p>  |
| <p>1.65 8364 23.86 209 Angew. Chem. Int. Ed. 2008, 47, 6236 -6239</p>                                                      | <p>1.647 8320 27.5 140 Chem. Eur. J. 2009, 15, 5775 - 5792</p>                                                             | <p>1.64 8126 25.3 138 J. Mater. Chem. A, 2016, 4, 16961-16967</p>                                                           |
| <p style="text-align: center;">483</p>                                                                                     | <p style="text-align: center;">484</p>                                                                                     | <p style="text-align: center;">485</p>                                                                                      |

|                                                                                                   |                                                                                               |                                                                                       |
|---------------------------------------------------------------------------------------------------|-----------------------------------------------------------------------------------------------|---------------------------------------------------------------------------------------|
| 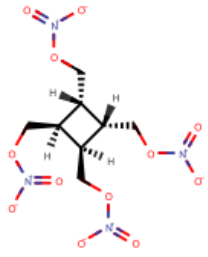                 |              |    |
| <p>1.64 7438 24.5 198.5<br/>J. Am. Chem. Soc. 2019, 141, 12531-12535</p>                          | <p>1.64 8249 28.6 104.1<br/>Dalton Trans., 2019, 48, 1524</p>                                 | <p>1.64 7403 20.1 191<br/>Chem. Asian J. 2019, 00, 0-0</p>                            |
| 486                                                                                               | 487                                                                                           | 488                                                                                   |
|                  |              |    |
| <p>1.635 6506 14.4 303<br/>New J. Chem., 2019, 43(3): 1305-1312</p>                               | <p>1.634 7336 19.7 328<br/>J. Mater. Chem. A, 2018, 6(18): 8382-8387.</p>                     | <p>1.63 7917 23.1 127<br/>J. Mater. Chem. A, 2016, 4, 9931-9940</p>                   |
| 489                                                                                               | 490                                                                                           | 491                                                                                   |
|                |            |  |
| <p>1.63 7703 24.1 183<br/>European Journal of Inorganic Chemistry, 2016, 2016(19): 3086-3093.</p> | <p>1.63 7100 20.9 170.9<br/>Chinese Journal of Energetic Materials, 2019, 27(2): 125-130.</p> | <p>1.63 7793 21.9 185<br/>Chem. Eur. J. 2009, 15, 4102 - 4110</p>                     |
| 492                                                                                               | 493                                                                                           | 494                                                                                   |

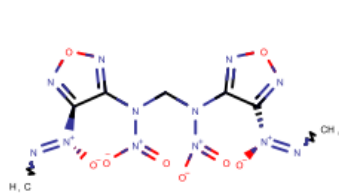

1. 62 8135 26. 8 162 J.  
Mater. Chem. A, 2016  
, 4, 16961-16967

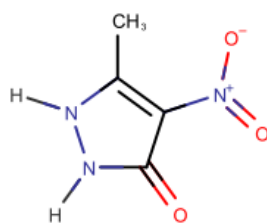

1. 62 7282 18. 77 235 C  
hinese Journal of Ene  
rgetic Materials, 201  
7, 25, 645-650

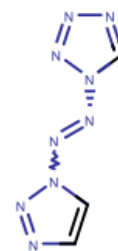

1. 62 7764 25. 2 194 Ch  
em. Eur. J. 2014, 20,  
6707- 6712

495

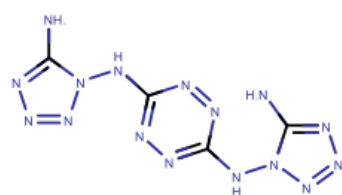

1. 62 8331 24. 98 209 A  
ngew. Chem. Int. Ed.  
2008, 47, 6236 -6239

496

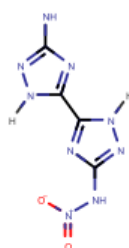

1. 6137 5745. 5 9. 6 160  
Chinese Journal of E  
nergetic Materials, 20  
19, 27 (12) :1031-1035.

497

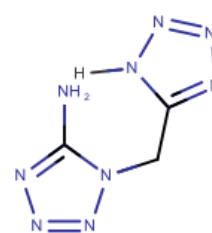

1. 61 7780 20. 9 217 J.  
Mater. Chem. A, 2017  
, 5, 16767-16775

498

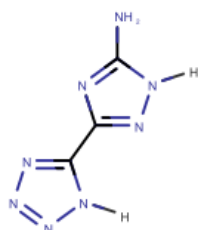

1. 61 7193 18. 7 347 Ch  
em. Asian J. 2013, 8,  
1463 - 1471

499

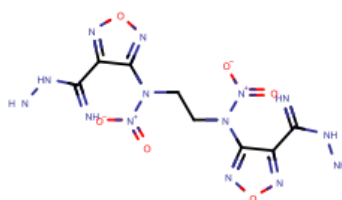

1. 6 7914 23. 3 145 J.  
Mater. Chem. A, 2016,  
4, 16961-16967

500

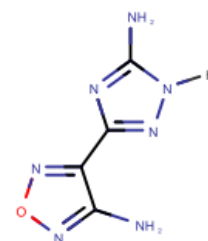

1. 596 6846 19. 3 302. 3  
3 Chemistry-A Europea  
n Journal, 2018, 24(4  
1): 10488-10497.

501

502

503

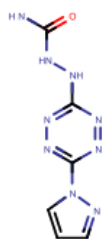

1. 593 6937 15. 8 230. 5  
New J. Chem., 2019, 4  
3, 18637–18646

504

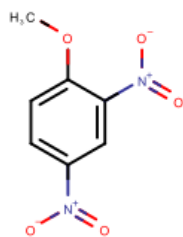

1. 59 6705 16. 1 315 Ne  
w J. Chem., 2016, 40,  
6059–6069

505

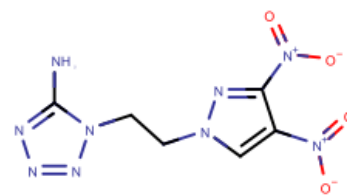

1. 59 7516 20. 6 232 J.  
Mater. Chem. A, 2016,  
4, 9931–9940

506

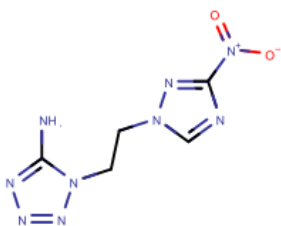

1. 58 7395 18. 8 255 J.  
Mater. Chem. A, 2016,  
4, 9931–9940

507

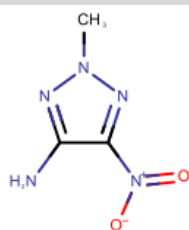

1. 58 7497 20. 8 / J. M  
ater. Chem. A, 2013,  
1, 585–593

508

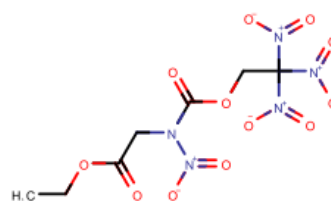

1. 58 7255 21. 4 190 Ch  
em. Eur. J. 2013, 19,  
15627 – 15638

509

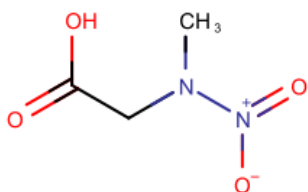

1. 58 6961 16. 8 153 Ch  
em. Asian J. 2016, 11  
, 3134 –3144

510

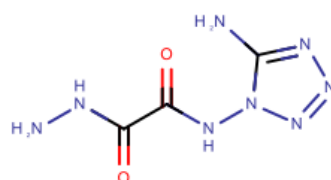

1. 58 7285 18. 19 214 A  
ngew. Chem. Int. Ed.  
2008, 47, 6236 –6239

511

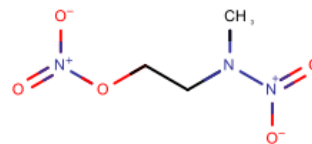

1. 57 8050 25. 9 / Z. A  
norg. Allg. Chem. 201  
1, 637, (14–15), 2135  
–2141

512



|                                                                                                                                                                       |                                                                                                                                                                 |                                                                                                                                                                  |
|-----------------------------------------------------------------------------------------------------------------------------------------------------------------------|-----------------------------------------------------------------------------------------------------------------------------------------------------------------|------------------------------------------------------------------------------------------------------------------------------------------------------------------|
| 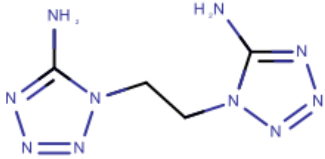 <p>1. 57 7719 19.9 274 J. Mater. Chem. A, 2016, 4, 9220–9228</p>                    |  <p>1. 57 7464 20.1 195 J. Mater. Chem. A, 2014, 2, 3200–3208</p>              |  <p>1. 57 7670 21.3 56 Chem. Asian J. 2016, 11, 3134–3144</p>                 |
| <p>513</p>  <p>1. 55 7264 18.4 180 Eur. J. Inorg. Chem. 2014, 4756–4771</p>          | <p>514</p>  <p>1. 55 7276 18.1 201 Chem. Asian J. 2016, 11, 3134–3144</p>      | <p>515</p>  <p>1. 545 6980 19.65 205 Eur. J. Inorg. Chem. 2014, 1231–1238</p> |
| <p>516</p>  <p>1. 543 7577 24.5 186.8 J. Am. Chem. Soc. 2019, 141, 12531–12535</p> | <p>517</p>  <p>1. 54 6840 18.8 / Eur. J. Org. Chem. 2019, 988–994</p>        | <p>518</p>  <p>1. 54 7350 18.5 162 Eur. J. Inorg. Chem. 2014, 4756–4771</p> |
| <p>519</p>  <p>1. 54 6890 18.1 177 Chem. Eur. J. 2013, 19, 15627–15638</p>         | <p>520</p>  <p>1. 53 7072 16.8 254 J. Mater. Chem. A, 2016, 4, 9931–9940</p> | <p>521</p>  <p>1. 53 7690 20.9 / J. Mater. Chem. A, 2018, 6, 1915–1940</p>  |

|                                                                                                                                                                                          |                                                                                                                                                                                          |                                                                                                                                                                                                               |
|------------------------------------------------------------------------------------------------------------------------------------------------------------------------------------------|------------------------------------------------------------------------------------------------------------------------------------------------------------------------------------------|---------------------------------------------------------------------------------------------------------------------------------------------------------------------------------------------------------------|
| 522                                                                                                                                                                                      | 523                                                                                                                                                                                      | 524                                                                                                                                                                                                           |
| 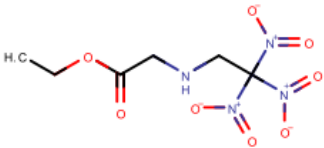 <p data-bbox="261 501 592 629">1. 53 7259 20 123 Chem<br/>. Eur. J. 2013, 19, 1<br/>5627 - 15638</p>   |  <p data-bbox="635 501 967 629">1. 53 7669 19.4 116 Ch<br/>em. Asian J. 2016, 11<br/>, 3134 -3144</p>   |  <p data-bbox="999 501 1331 674">1. 524 8572 25.09 141<br/>Chemical Communicatio<br/>ns, 2017, 53(15): 232<br/>7-2330.</p> |
| 525                                                                                                                                                                                      | 526                                                                                                                                                                                      | 527                                                                                                                                                                                                           |
|  <p data-bbox="261 1003 592 1131">1. 5 6436 16.3 276.5 N<br/>ew J. Chem., 2019, 43,<br/>18637-18646</p> |  <p data-bbox="635 1003 967 1131">1. 5 7041 16.3 120 J.<br/>Mater. Chem. A, 2016,<br/>4, 9220-9228</p>  |  <p data-bbox="999 1003 1331 1131">1. 48 7816 21.5 / Eur.<br/>J. Inorg. Chem. 2014<br/>, 4756-4771</p>                     |
| 528                                                                                                                                                                                      | 529                                                                                                                                                                                      | 530                                                                                                                                                                                                           |
|  <p data-bbox="261 1480 592 1608">1. 48 7619 19.1 / Chem<br/>. Eur. J. 2009, 15, 5<br/>775 - 5792</p> |  <p data-bbox="635 1480 967 1608">1. 48 6645 13.3 / Chem<br/>. Eur. J. 2009, 15, 5<br/>775 - 5792</p> |  <p data-bbox="999 1480 1331 1608">1. 48 7286 20.5 178 Ch<br/>em. Asian J. 2016, 11<br/>, 3134 -3144</p>                  |
| 531                                                                                                                                                                                      | 532                                                                                                                                                                                      | 533                                                                                                                                                                                                           |

|                                                                                                                                                                                     |                                                                                                                                                                                     |                                                                                                                                                                      |
|-------------------------------------------------------------------------------------------------------------------------------------------------------------------------------------|-------------------------------------------------------------------------------------------------------------------------------------------------------------------------------------|----------------------------------------------------------------------------------------------------------------------------------------------------------------------|
| 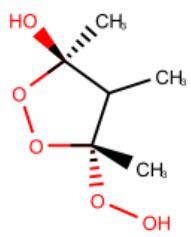 <p>1. 474 6461 13.6 133 Eur. J. Inorg. Chem. 2016, 5036–5043</p>                                  |  <p>1. 469 6694 15.4 118 Eur. J. Inorg. Chem. 2016, 5036–5043</p>                                  |  <p>1. 46 6490 16.3 / Eur. J. Org. Chem. 2019, 988–994</p>                        |
| <p>534</p>  <p>1. 44 6729 14.2 186 Chem. Asian J. 2016, 11, 3134–3144</p>                          | <p>535</p>  <p>1. 44 7600 19 195 Angew. Chem. Int. Ed. 2008, 47, 6236–6239</p>                     | <p>536</p>  <p>1. 44 6739 14.17 193 Angew. Chem. Int. Ed. 2008, 47, 6236–6239</p> |
| <p>537</p>  <p>1. 438 6343 13.3 121 Eur. J. Org. Chem. 2015, 6237–6242</p>                       | <p>538</p>  <p>1. 425 6511 13.4 96 Eur. J. Inorg. Chem. 2016, 5036–5043</p>                      | <p>539</p>  <p>1. 411 6350 13 124 Eur. J. Inorg. Chem. 2016, 5036–5043</p>      |
| <p>540</p>  <p>1. 4 7109 14.8 190 Zeitschrift für Naturforschung B, 2016, 71(12): 1199–1209.</p> | <p>541</p>  <p>1. 4 7132 14.9 186 Zeitschrift für Naturforschung B, 2016, 71(12): 1199–1209.</p> | <p>542</p>  <p>1. 4 6103 10.9 82 Eur. J. Inorg. Chem. 2016, 5036–5043</p>       |

|                                                                                                                                                                                                                                       |                                                                                                                                                                                                    |                                                                                                                                                                                                                                         |
|---------------------------------------------------------------------------------------------------------------------------------------------------------------------------------------------------------------------------------------|----------------------------------------------------------------------------------------------------------------------------------------------------------------------------------------------------|-----------------------------------------------------------------------------------------------------------------------------------------------------------------------------------------------------------------------------------------|
| <p style="text-align: center;">543</p> 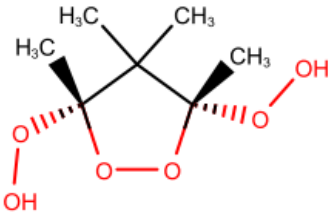 <p>1. 387 6357 12.4 64 Eur<br/>r. J. Inorg. Chem. 20<br/>16, 5036-5043</p>                                   | <p style="text-align: center;">544</p>  <p>1. 36 6100 10.4 67 Eur<br/>. J. Inorg. Chem. 201<br/>6, 5036-5043</p>  | <p style="text-align: center;">545</p>  <p>1. 339 6048 10.9 136 E<br/>ur. J. Org. Chem. 201<br/>5, 6237-6242</p>                                     |
| <p style="text-align: center;">546</p>  <p>1. 328 5954 9.8 95 Eur<br/>. J. Inorg. Chem. 201<br/>6, 5036-5043</p>                                     | <p style="text-align: center;">547</p>  <p>1. 321 6141 10.6 110 E<br/>ur. J. Org. Chem. 201<br/>5, 6237-6242</p>  | <p style="text-align: center;">548</p>  <p>1. 314 6135 10.5 108 E<br/>ur. J. Org. Chem. 201<br/>5, 6237-6242</p>                                     |
| <p style="text-align: center;">549</p>  <p>1. 248 6191 10 119 Eur<br/>opean Journal of Orga<br/>nic Chemistry, 2016,<br/>2016 (25): 4382-4386.</p> | <p style="text-align: center;">550</p>  <p>1. 244 6127 9.7 116 Eu<br/>r. J. Org. Chem. 2015<br/>, 6237-6242</p> | <p style="text-align: center;">551</p>  <p>1. 24 6146 10 129 Euro<br/>pean Journal of Organ<br/>ic Chemistry, 2016, 2<br/>016 (25): 4382-4386.</p> |
| <p style="text-align: center;">552</p>                                                                                                                                                                                                | <p style="text-align: center;">553</p>                                                                                                                                                             | <p style="text-align: center;">554</p>                                                                                                                                                                                                  |

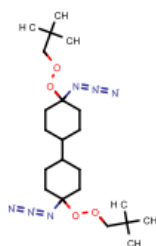

1.22 6435 10 115 Euro  
pean Journal of Organ  
ic Chemistry, 2016, 2  
016(25): 4382–4386.

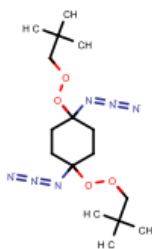

1.21 6338 11 143 Euro  
pean Journal of Organ  
ic Chemistry, 2016, 2  
016(25): 4382–4386.

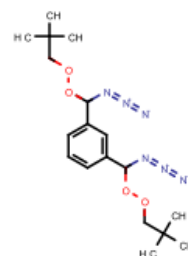

1.21 5989 9 104 Europ  
ean Journal of Organi  
c Chemistry, 2016, 20  
16(25): 4382–4386.

555

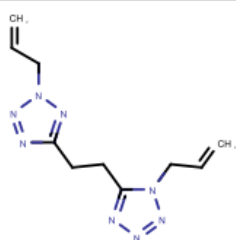

1.2 6167 9.9 230 Zeit  
schrift fur Naturfors  
chung B, 2016, 71(12)  
: 1199–1209.

556

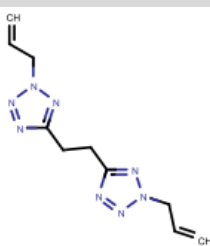

1.2 6148 9.9 225 Zeit  
schrift fur Naturfors  
chung B, 2016, 71(12)  
: 1199–1209.

557

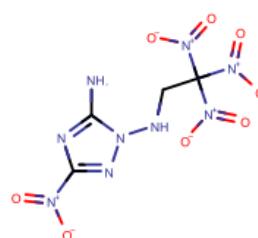

1.82 8828 34.7 108 J.  
Mater. Chem. A, 2014,  
2, 3200–3208

558

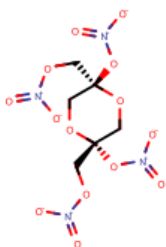

1.79 / / 45 Z. Anorg.  
Allg. Chem. 2017, 64  
3, 149–151

559

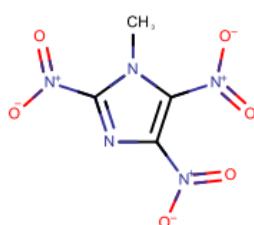

1.768 7680 24.5 / Pro  
pellants Explos. Pyro  
tech. 2016,41, 789– 7  
92

560

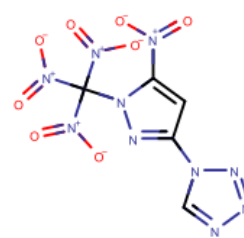

1.757 8780 32 132 Che  
mistry – An Asian Jou  
rnal

561

562

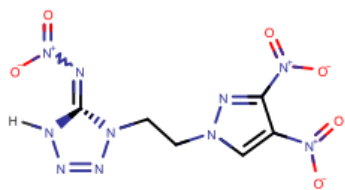

1.69 8114 26.7 157 J.  
Mater. Chem. A, 2016,  
4, 9931-9940

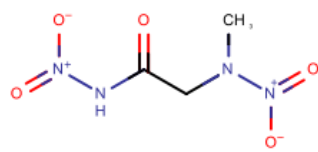

1.67 8033 25.6 113 Ch  
em. Asian J. 2016, 11  
, 3134 -3144

**Note: The captions under molecular structure represent density (g/cm<sup>3</sup>), detonation velocity (m/s), detonation pressure (GPa), decomposition temperature (°C) and reference.**
